# Supplementary material for: Protocol for the DisCoVeRy trial: multicentre, adaptive, randomised trial of the safety and efficacy of treatments for COVID-19 in hospitalised adults
Source: PubMed Central journal article supplement — BMJ Open. 2020 Sep 21;10(9):e041437. doi: 10.1136/bmjopen-2020-041437 (PMC7507250; doi:10.1136/bmjopen-2020-041437), 2020-09-21
Supplement: bmjopen-2020-041437.draft_revisions.pdf [file bmjopen-2020-041437.draft_revisions.pdf]

# BMJ Open

BMJ Open is committed to open peer review. As part of this commitment we make the peer review history of every article we publish publicly available.

When an article is published we post the peer reviewers' comments and the authors' responses online. We also post the versions of the paper that were used during peer review. These are the versions that the peer review comments apply to.

The versions of the paper that follow are the versions that were submitted during the peer review process. They are not the versions of record or the final published versions. They should not be cited or distributed as the published version of this manuscript.

BMJ Open is an open access journal and the full, final, typeset and author-corrected version of record of the manuscript is available on our site with no access controls, subscription charges or pay-per-view fees (<http://bmjopen.bmj.com>).

If you have any questions on BMJ Open's open peer review process please email [info.bmjopen@bmj.com](mailto:info.bmjopen@bmj.com)

# BMJ Open

## The DisCoVeRy trial: multi-centre, adaptive, randomized trial of the safety and efficacy of treatments for COVID-19 in hospitalized adults

|                               |                                                                                                                                      |
|-------------------------------|--------------------------------------------------------------------------------------------------------------------------------------|
| Journal:                      | <i>BMJ Open</i>                                                                                                                      |
| Manuscript ID                 | bmjopen-2020-041437                                                                                                                  |
| Article Type:                 | Protocol                                                                                                                             |
| Date Submitted by the Author: | 08-Jun-2020                                                                                                                          |
| Complete List of Authors:     | Ader, Florence; Centre Hospitalier Universitaire de Lyon,                                                                            |
| Keywords:                     | Clinical trials < THERAPEUTICS, INFECTIOUS DISEASES, Respiratory infections < THORACIC MEDICINE, Public health < INFECTIOUS DISEASES |
|                               |                                                                                                                                      |

SCHOLARONE™  
Manuscripts

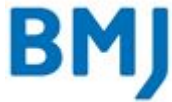

I, the Submitting Author has the right to grant and does grant on behalf of all authors of the Work (as defined in the below author licence), an exclusive licence and/or a non-exclusive licence for contributions from authors who are: i) UK Crown employees; ii) where BMJ has agreed a CC-BY licence shall apply, and/or iii) in accordance with the terms applicable for US Federal Government officers or employees acting as part of their official duties; on a worldwide, perpetual, irrevocable, royalty-free basis to BMJ Publishing Group Ltd ("BMJ") its licensees and where the relevant Journal is co-owned by BMJ to the co-owners of the Journal, to publish the Work in this journal and any other BMJ products and to exploit all rights, as set out in our [licence](#).

The Submitting Author accepts and understands that any supply made under these terms is made by BMJ to the Submitting Author unless you are acting as an employee on behalf of your employer or a postgraduate student of an affiliated institution which is paying any applicable article publishing charge ("APC") for Open Access articles. Where the Submitting Author wishes to make the Work available on an Open Access basis (and intends to pay the relevant APC), the terms of reuse of such Open Access shall be governed by a Creative Commons licence – details of these licences and which [Creative Commons](#) licence will apply to this Work are set out in our licence referred to above.

Other than as permitted in any relevant BMJ Author's Self Archiving Policies, I confirm this Work has not been accepted for publication elsewhere, is not being considered for publication elsewhere and does not duplicate material already published. I confirm all authors consent to publication of this Work and authorise the granting of this licence.

1  
2  
3 1 **TITLE**

4  
5 2 **The DisCoVeRy trial: multi-centre, adaptive, randomized trial of the safety and efficacy of**  
6  
7 3 **treatments for COVID-19 in hospitalized adults**

8  
9 4  
10  
11 5 **AUTHORS**

12 6 **The DisCoVeRy French Trial Management Team**

13  
14 7  
15  
16 8 **CORRESPONDING AUTHOR:**

17  
18 9 Florence Ader, M.D., Ph.D. Département des Maladies infectieuses et tropicales, Hôpital de la Croix-  
19  
20 10 Rousse, Hospices Civils de Lyon, Lyon, France. ☎: +33 (0)472 071 560; 📠: +33 (0)472 072 441; ✉:  
21  
22 11 [florence.ader@chu-lyon.fr](mailto:florence.ader@chu-lyon.fr)

23  
24 12  
25  
26 13 **AUTHOR CONTRIBUTIONS:**

27  
28 14 **The French DisCoVeRy Trial Management Team**

29  
30 15 **Principal Investigator:** Florence ADER

31  
32 16 **Scientific coordinator:** Yazdan YAZDANPANA

33  
34 17 **Chief methodologist:** France MENTRE

35  
36 18 **Infectious diseases specialists:** Nathan PEIFFER-SMADJA, François-Xavier LESCURE

37  
38 19 **Intensivists:** Julien POISSY, Lila BOUADMA, Jean-François TIMSIT

39  
40 20 **Virologists:** Bruno LINA, Florence MORFIN-SHERPA, Maude BOUSCAMPBART, Alexandre  
41  
42 21 GAYMARD

43  
44 22 **Pharmacologist:** Gilles PEYTAVIN

45  
46 23 **Genetic:** Laurent ABEL

47  
48 24 **Viral modeling:** Jeremie GUEDJ

49  
50 25 **Pneumologist:** Claire ANDREJAK

51  
52 26 **Clinical Trial Unit:**

53  
54 27 **Methodologists:** Charles BURDET, Cedric LAOUENAN

55  
56 28 **Statisticians:** Drifa BELHADI, Axelle DUPONT

1  
2  
3 29 **E-CRF designers and data managers:** Toni ALFAIATE, Basma BASLI, Anissa CHAIR, Samira  
4 LARIBI, Julie LEVEL Marion SCHNEIDER, Marie-Capucine TELLIER  
5 30  
6  
7 31 **Project manager:** Aline DECHANET  
8  
9 32 **DisCoVeRy Trial steering committee:** Dominique COSTAGLIOLA  
10  
11 33 **Inserm sponsor:** Sandrine COUFFIN-CADIERGUES, H el ene ESPEROU,  
12  
13 34 **Inserm project manager:** Christelle DELMAS, Juliette SAILLARD  
14  
15 35 **Monitoring:** Claire FOUGEROU, La etitia MOINOT, Linda WITTKOP  
16  
17 36 **ANRS coordination:** Carole CAGNOT, Soizic LE MESTRE, Delphine LEBRASSEUR-LONGUET,  
18  
19 Ventzislava PETROV-SANCHEZ  
20  
21 37  
22 38 **Inserm-ANRS Pharmacovigilance:** Alpha DIALLO, No emie MERCIER,  
23  
24 39 **Samples handling:** Vinca ICARD, Benjamin LEVEAU, Sarah TUBIANA  
25  
26 40 **Drug supply:** Benjamin HAMZE, Ambre GELLEY  
27  
28 41 **RENARCI:** Marion NORET  
29  
30 42 **REACTing:** Eric D'ORTENZIO, Oriane PUECHAL, Caroline SEMAILLE  
31  
32  
33  
34

#### 44 **ACKNOWLEDGEMENTS**

35  
36 45 We acknowledge the members of the DSMB: Stefano VELLA (chair), Guanhua DU, Donata  
37 46 MEDAGLINI, Mike JACOBS, Sylvie VAN DER WERF, Stuart POCOCK, Phaik Yeong CHEAH, Karen  
38 47 BARNES, Patrick YENI, and the independent statistician Tim COLLIER.

39  
40 48 We acknowledge the principal investigators of each participating centre (by alphabetical order): CHU  
41 49 Amiens: Jean Philippe LANOIX, Yoann ZERBIB, CHU Avicenne, AP-HP: Olivier BOUCHAUD, Yves  
42 50 COHEN, CH Annecy-Genevois: Violaine TOLSMA, David BOUGON, CHU Besan on: Kevin  
43 51 BOUILLER, Jean-Christophe NAVELLOU, HIA B egin: C ecile FICKO, Cl ement DUBOST, CHU Bichat-  
44 52 Claude Bernard, AP-HP : Fran ois-Xavier LESCURE, Jean-Fran ois TIMSIT, CHU Bordeaux: Denis  
45 53 MALVY, Didier GRUSON, CHU Cochin, AP-HP : Odile LAUNAY, Jean-Paul MIRA, Solen KERNEIS,  
46 54 Marie LACHATRE, CHU Dijon: Lionel PIROTH, Jean-Pierre QUENOT, Hopital Erasme: Maya HITES,  
47 55 CHU Fort-de-France: Andr e CABIE, Cyrille CHABARTIER, CHU Grenoble: Olivier EPAULARD, Nicolas  
48 56 TERZI, CHU HEGP, AP-HP: David LEBEAUX, Jean-Luc DIEHL, Medizinische Universit t Innsbruck :  
49 57 Michael JOANNIDIS, CHU Kremlin-Bic tre, AP-HP: Stephane JAUREGUIBERRY, Samy

1  
2  
3 58 FIGUEIREDO, CHR La Citadelle: Antoine ALTDORFER, CHRU Lille: Karine FAURE, Julien POISSY,  
4  
5 59 Kepler Universitätsklinikum Linz : Bernd LAMPRECHT, Centre Hospitalier de Luxembourg: Thérèse  
6  
7 60 STAUB, Jean REUTER, Hospices Civils de Lyon: Florence ADER, Jean-Christophe RICHARD, CHR  
8  
9 61 Metz: Céline ROBERT, Rostane GACI, CHU Montpellier: Vincent LE MOING, Kada KLOUCHE, CHU  
10  
11 62 Mondor, AP-HP: Sébastien GALLIEN, Armand MEKONTSO DESSAP, GHR Mulhouse: Joy MOOTIEN,  
12  
13 63 Olivier HINSCHBERGER, CHRU Nancy: François GOEHRINGER, Sébastien GIBOT, CHU Nantes:  
14  
15 64 François RAFFI, Jean REIGNIER, CHU Nice: Johan COURJEON, Jean DELLAMONICA, Sylvie  
16  
17 65 LEROY, Charles-Hugo MARQUETTE, CHU Pitié-Salpêtrière, AP-HP: Valérie POURCHER, Julien  
18  
19 66 MAYAUX, CHU Tenon, AP-HP: Gilles PIALOUX, Murielle FARTOUKH, CHU Saint-Antoine, AP-HP:  
20  
21 67 Karine LACOMBE, Hafid AIT TOUFELLA, CHU Saint-Louis, AP-HP: Jean-Michel MOLINA, Elie  
22  
23 68 AZOULAY, Clinique universitaire Saint-Luc: Leïla BELKHIR, CHU Reims: Firouze BANI-SADR, Bruno  
24  
25 69 MOURVILLIER, CHU Rennes: François BENEZIT, Yves LE TULZO, CH Saint-Denis: Jérôme ABOAB,  
26  
27 70 Flora CROCKETT, Hopital Robert Schuman: Marc BERNA, GH Paris Saint-Joseph-Marie Lannelongue:  
28  
29 71 Cédric BRUEL, Benoit PILMIS, François STEFAN, Jérôme LE PAVEC, CHU Saint-Étienne: Elisabeth  
30  
31 72 BOTELHO-NEVERS, Guillaume THIERY, Landeskrankenhaus Salzburg: Richard GREIL, CHRU  
32  
33 73 Strasbourg: François DANION, Ferhat MEZIANI, CHU Toulouse: Guillaume MARTIN BLONDEL,  
34  
35 74 Béatrice RIU-POULENC, Fanny BOUNES-VARDON, CH Tourcoing: Eric SENNEVILLE, Vanessa  
36  
37 75 JEAN-MICHEL, CHU Tours: Louis BERNARD, Denis GAROT.  
38  
39 76 We acknowledge the following individuals: Drug supply: Johanna GUILLON, Anne-Marie TABURET  
40  
41 77 Project manager, Monitoring Project Managers: Chloé BIRKLE (ANRS), Cécile MOINS (ANRS), Lydie  
42  
43 78 BENIGUEL (CMG U1136, Inserm), Michèle GENIN (CMG U1136, Inserm), Asma ESSAT (SC10 1018,  
44  
45 79 Inserm), Mathilde GHISLAIN (SC10 1018, Inserm), Maud BROSSARD (SC10 1018, Inserm), Yoann  
46  
47 80 RIAULT (Inserm), Emmanuelle NETZER (Inserm), Alain CARO (DRI Rennes), Charlotte CAMELI (DRI  
48  
49 81 Rennes), Marie-José NGO UM TEGUE (DRI Rennes), Virginie GODARD (URC Bichat)  
50  
51 82 Pharmacovigilance: Séverine GIBOWSKI, Christelle PAUL, Elise LANDRY, Joséphine BALSSA, Léna  
52  
53 83 WADOUACHI, Anais LE GOFF, Laurence MOACHON, Inserm-Transfert: Pascale AUGÉ, Mireille  
54  
55 84 CARALP, Nathalie DUGAS, Clinical Research Unit CHU Bichat-Claude Bernard: Camille  
56  
57 85 COUFFIGNAL.  
58  
59 86 We thank all staff involved in data monitoring. We thank the COVID-19 Partners Platform.  
60

1  
2  
3 87 This study was conducted with the support of GILEAD, SANOFI, MERCK and ABBVIE that provided  
4  
5 88 the study drugs.

6  
7 89 We acknowledge the support of Université Claude Bernard Lyon 1, Hospices Civils de Lyon, Université  
8  
9 90 de Paris, and the French Society for Infectious Diseases (SPILF).

10  
11 91

## 12 92 **FUNDING**

13  
14 93 The trial is funded by a grant from Programme Hospitalier de Recherche Clinique - PHRC 2020 (PHRC-  
15  
16 94 20-0351) (Ministry of Health). This study also received a financial support from REACTing, a French  
17  
18 95 multi-disciplinary collaborative network working on emerging infectious diseases.

19  
20 96 The trial is sponsored by Institut national de la santé et de la recherche médicale (INSERM, France).

21  
22 97

## 23 98 **DISCLAIMER**

24  
25  
26 99 The funder nor the sponsor did not have any role in the design of the trial

27  
28 100

## 29 101 **COMPETING INTERESTS**

30  
31 102

32  
33 103 François-Xavier Lescure reports fees for development of educational presentations from Gilead, outside  
34  
35 104 the submitted work. Dominique Costagliola reports personal fees from Merck Switzerland, grants and  
36  
37 105 personal fees from MSD France, personal fees from Gilead France, grants and personal fees from  
38  
39 106 Janssen, outside the submitted work. Jean-François Timsit reports grants and personal fees from  
40  
41 107 Merck, grants and personal fees from Pfizer, grants from biomerieux, personal fees from medimune,  
42  
43 108 personal fees from Paratek, personal fees from Gilead, outside the submitted work. Benjamin Hamze  
44  
45 109 reports personal fees from Sanofi, outside the submitted work. Gilles Peytavin has received travel  
46  
47 110 grants, consultancy fees, honoraria, or study grants from various pharmaceutical companies, including  
48  
49 111 Gilead Sciences, Merck, TheraTechnologies and ViiV Healthcare. France Mentre reports grants and  
50  
51 112 personal fees from Sanofi, outside the submitted work.

52  
53 113 Other authors declare no competing interests.

54  
55 114

## 56 115 **DATA SHARING STATEMENT**

57  
58  
59  
60

1  
2  
3 116 Systematic data sharing is not intended, but all requests for the trial's data will be considered by the  
4  
5 117 French DisCoVeRy Trial Management Team  
6

7 118

8  
9 119 **ETHICS APPROVAL**

10 120 Ethical approval was first obtained in France from the institutional review board on March 13, 2020  
11  
12 121 (Comité de Protection des Personnes Ile de France 3, approval number 20.03.06.51744), and the trial  
13  
14 122 received approval by the French National Agency for Medicines and Health Products (ANSM) on March  
15  
16 123 9, 2020. The protocol described in this article is the version 7.0 of the DisCoVeRy protocol approved on  
17  
18 124 April 5, 2020. Any substantial amendment made to the protocol by the coordinating investigator is sent  
19  
20 125 to local ethics committee and health authorities in each country for approval, prior to implementation.  
21

22 126 **INFORMED CONSENT**

23  
24 127 Prior to any act carried out as part of the research, subjects receive a concise and focused presentation  
25  
26 128 of key information about the clinical trial, verbally and with a written consent form. An emergency consent  
27  
28 129 procedure with the legal guardian or relatives of the patient has been put in place for patients who are  
29  
30 130 unable to consent. The forms have been reviewed by the Ethics committee that authorized the trial.  
31

32 131 **KEYWORDS**

33 132 COVID-19; SARS-CoV-2; Randomized clinical trial; Efficacy; Safety; Type 1 interferon; Remdesivir;  
34  
35 133 Lopinavir/ritonavir; Hydroxychloroquine;  
36

37 134

38  
39 135 **Text count: 4777 words**  
40  
41  
42  
43  
44  
45  
46  
47  
48  
49  
50  
51  
52  
53  
54  
55  
56  
57  
58  
59  
60



**136 ABSTRACT****137 Introduction**

138 To find effective and safe treatments for COVID-19, the WHO recommended to systemically evaluate  
139 experimental therapeutics in collaborative randomized clinical trials. As COVID-19 was spreading in  
140 Europe, the French national institute for Health and Medical Research (Inserm) established a trans-  
141 disciplinary team to develop a multi-arm randomized controlled trial named DisCoVeRy. The objective  
142 of the trial is to evaluate the clinical efficacy and safety of different investigational repurposed  
143 therapeutics relative to Standard of Care (SoC) in patients hospitalized with COVID-19.

**144 Methods and analysis**

145 DisCoVeRy is a phase III, open-label, adaptive, controlled, multicentre clinical trial in which hospitalized  
146 patients with COVID-19 in need of oxygen therapy are randomized between 5 arms: (i) a control group  
147 managed with SoC and four therapeutic arms with repurposed antiviral agents: (ii) remdesivir + SoC,  
148 (iii) lopinavir/ritonavir + SoC, (iv) lopinavir/ritonavir associated with interferon (IFN)- $\beta$ -1a + SoC and (v)  
149 hydroxychloroquine + SoC. The primary endpoint is the clinical status at Day 15 on the 7-point ordinal  
150 scale of the WHO Master Protocol (version 3.0, March 3, 2020). This trial involves patients hospitalized  
151 in conventional departments or intensive care units both from academic or non-academic hospitals  
152 throughout Europe. A sample size of 3,100 patients (620 patients per arm) is targeted. This trial has  
153 begun on March 22, 2020. Since April 5, 2020, DisCoVeRy has been an add-on trial of the Solidarity  
154 consortium of trials conducted by the WHO in Europe and worldwide. On June 8, 2020, 754 patients  
155 have been included.

**156 Ethics and dissemination**

157 Inserm is the sponsor of DisCoVeRy. Ethical approval has been obtained from the institutional review  
158 board on March 13, 2020 (20.03.06.51744) and from the French National Agency for Medicines and  
159 Health Products (ANSM) on March 9, 2020. Results will be submitted for publication in peer-reviewed  
160 journals.

**161 Trial registration number**

162 NCT04315948 Eudra-CT 2020-000936-23

1  
2  
3 163 **ARTICLE SUMMARY**

4  
5 164 **STRENGTHS AND LIMITATIONS OF THIS STUDY**

6  
7 165 . The DisCoVeRy clinical trial is an adaptive, randomized, open-label clinical trial that aims to evaluate  
8  
9 166 the safety and efficacy of 4 antiviral therapeutic strategies as compared to standard of care in  
10  
11 167 hospitalized adult patients diagnosed with COVID-19.

12  
13 168 . Therapeutic strategies can be modified according to new evidence: an arm can become the  
14  
15 169 standard of care if proved superior to others, arms can be discontinued if proved inferior to others  
16  
17 170 and arms can be added if new candidate therapeutic strategies emerge.

18  
19 171 . DisCoVeRy is an add-on trial of the Solidarity consortium of trials, conducted under the aegis of the  
20  
21 172 WHO and data on common endpoints are shared with the Solidarity consortium.

22  
23 173 . DisCoVeRy is not a placebo-controlled trial and is not double-blind because of the complexity of  
24  
25 174 blinding treatments with different mode of administration (intravenous, sub-cutaneous or oral) and  
26  
27 175 the need to initiate the trial very rapidly.

28  
29 176 . DisCoVeRy includes patients who are hospitalized and in need of oxygen therapy and does not  
30  
31 177 target patients at the early phase of the disease.

32  
33 178 . DisCoVeRy does not include anti-inflammatory agents that can be used as part of the standard of  
34  
35 179 care in any arm.

36 180  
37  
38  
39  
40  
41  
42  
43  
44  
45  
46  
47  
48  
49  
50  
51  
52  
53  
54  
55  
56  
57  
58  
59  
60

## 181 INTRODUCTION

### 182 **Background and scope**

183 Severe acute respiratory syndrome coronavirus 2 (SARS-CoV-2) is the third coronavirus that has  
184 crossed the species barrier to cause deadly pneumonia in humans since the beginning of the 21st  
185 century, after SARS-CoV [1,2] and Middle-East respiratory syndrome coronavirus [3] (MERS-CoV) in  
186 2002 and 2012, respectively. The first case of infection with the SARS-CoV-2 was reported in the city  
187 of Wuhan, China on December 31, 2019. The associated disease was named “coronavirus disease  
188 2019” (abbreviated “COVID-19”). The emergence and the spread of SARS-CoV-2 is an unprecedented  
189 challenge, vividly illustrating the pace at which a viral outbreak can progress among a highly interlinked  
190 and susceptible global population. At the beginning of March 2020, when this clinical trial was designed,  
191 COVID-19 had spread to more than 100 countries and affected more than 100,000 individuals.  
192 Consistently, the World Health Organization (WHO) declared COVID-19 pandemic on March 11,  
193 2020.[4]

194 Although many drugs have *in vitro* activity against various coronaviruses, no clinical evidence at that  
195 time supported the efficacy and safety of any drug against any coronavirus in humans, including SARS-  
196 CoV-2. The rapid and simultaneous combination of supportive care and randomized controlled trials  
197 (RCT) is the only way to find effective and safe treatments for COVID-19 that could improve patients'  
198 management. WHO thus recommended researchers around the world to systemically evaluate  
199 experimental therapeutics in RCT and to gather initiatives in large trials that could provide strong  
200 evidence about which treatment are safe and effective.

201 As COVID-19 was spreading in Europe, the French national institute for Health and Medical Research  
202 (Inserm) established a trans-disciplinary team to develop a multi-arm randomized controlled trial to  
203 rapidly provide reliable evidence about the efficacy and safety of therapeutics in comparison to a  
204 standard of care control arm. The WHO Master Protocol for therapeutics against COVID-19 version 3.0  
205 (March 3, 2020) published by the WHO R&D Blueprint Working Group [5] was used as a template for  
206 this clinical trial. Subsequently, the DisCoVeRy trial was launched in France in March 22, 2020.  
207 International cooperation being essential in outbreak science and public health, and in actions to prevent  
208 trans-frontier disease progression, the DisCoVeRy trial intends to bring together several European  
209 countries.

### 210 **Objective**

1  
2  
3 211 The objective of the DisCoVeRy trial is to evaluate the clinical efficacy and safety of different  
4 212 investigational therapeutics relative to Standard of Care (SoC) in patients hospitalized with COVID-19.

## 7 213 **METHODS AND ANALYSIS**

### 9 214 ***Design and general information***

10 215 DisCoVeRy is a phase III, open-label, adaptive, randomized, controlled, multicenter clinical trial  
11 216 designed to evaluate the safety and efficacy of repurposed therapeutic interventions in hospitalized adult  
12 217 patients diagnosed with COVID-19. This trial involves patients both from academic or non-academic  
13 218 hospitals throughout Europe, with Inserm as the Sponsor. Study sites can be obtained from the  
14 219 Sponsor's representative. The protocol described in this article is the version 7.0 of the DisCoVeRy  
15 220 protocol approved on April 5.

16 221 The DisCoVeRy RCT has 5 arms: (i) a control group managed SoC and four therapeutic arms with  
17 222 repurposed antiviral agents: (ii) remdesivir + SoC, (iii) lopinavir/ritonavir + SoC, (iv) lopinavir/ritonavir  
18 223 associated with interferon (IFN)- $\beta$ -1a + SoC and (v) hydroxychloroquine + SoC (Figure 1). The arms  
19 224 have not been modified between the version 1 and 7 of the protocol. Included participants cannot be  
20 225 treated with antivirals other than the study medications allocated by randomization, but non-antiviral  
21 226 drugs such as steroids, immunomodulatory agents (e.g. anti-interleukin 6 drugs), or antibiotics can be  
22 227 used as part of the standard of care. This is an open-label trial but all investigators are unaware of  
23 228 aggregate outcomes during the study. The design is adaptive upon decision of the DSMB: arms can be  
24 229 discontinued if proved inferior to others, an existing arm can become the standard of care if proved  
25 230 superior and arms can be added if new candidate therapeutic strategies emerge. The trial has been  
26 231 registered at the ClinicalTrials.org registry as NCT04315948 and on the European Clinical Trials  
27 232 Database as 2020-000936-23.

### 28 233 ***Participants***

29 234 For the duration of the study, the sponsor has subscribed an insurance policy covering the sponsor's  
30 235 own third-party liability as well as the third-party liability of all the investigators involved in the study.

### 31 236 Inclusion criteria

32 237 Patients must fulfil the following criteria prior to trial enrolment:

- 33 238 1. Adult  $\geq 18$  years of age at time of enrolment;
- 34 239 2. Has laboratory-confirmed SARS-CoV-2 infection as determined by PCR, or other commercial  
35 240 or public health assay in any specimen < 72 hours prior to randomization;

- 1  
2  
3 241 3. Hospitalized patients with illness of any duration, and at least one of the following:  
4  
5 242 – Clinical assessment of pulmonary infection (evidence of rales/crackles on exam) AND SpO<sub>2</sub>  
6  
7 243 ≤ 94% on room air, or  
8  
9 244 – Acute respiratory failure requiring supplemental oxygen, high flow oxygen devices, non-  
10  
11 245 invasive ventilation, and/or mechanical ventilation;  
12  
13 246 4. Women of childbearing potential must agree to use contraception for the duration of the study.

14  
15 247 Non-inclusion criteria

16 248 Patients with any of the following criteria are not eligible for trial enrolment:

- 17  
18 249 1. Refusal to participate expressed by patient or legally authorized representative if they are  
19  
20 250 present;  
21  
22 251 2. Spontaneous blood ALT/AST levels > 5 times the upper limit of normal;  
23  
24 252 3. Stage 4 severe chronic kidney disease or requiring dialysis (i.e. eGFR < 30 mL/min);  
25  
26 253 4. Pregnancy or breast-feeding;  
27  
28 254 5. Anticipated transfer to another hospital, which is not a study site within 72 hours;  
29  
30 255 6. Patients previously treated with one of the antivirals evaluated in the trial (i.e. remdesivir,  
31  
32 256 interferon β-1a, lopinavir/ritonavir, hydroxychloroquine) in the past 29 days;  
33  
34 257 7. Contraindication to any study medication including allergy;  
35  
36 258 8. Use of medications that are contraindicated with lopinavir/ritonavir i.e. drugs whose metabolism  
37  
38 259 is highly dependent on the isoform CYP3A with narrow therapeutic range (e.g. amiodarone,  
39  
40 260 colchicine, simvastatine);  
41  
42 261 9. Use of medications that are contraindicated with hydroxychloroquine: citalopram, escitalopram,  
43  
44 262 hydroxyzine, domperidone, piperazine;  
45  
46 263 10. Human immunodeficiency virus infection under combination antiretroviral therapy;  
47  
48 264 11. History of severe depression or attempted suicide or current suicidal ideation;  
49  
50 265 12. Corrected QT interval superior to 500 milliseconds (as calculated with the Fridericia formula).

51 266 **Randomisation**

52  
53 267 Patients are randomly assigned in a 1:1:1:1:1 ratio into one of the five groups. The randomisation list is  
54  
55 268 computer-generated, with blocks of various sizes and stratified by region (according to the administrative  
56  
57 269 definition in each country) and severity of illness at enrolment (severe disease: patients requiring non-  
58  
59 270 invasive ventilation, high flow oxygen devices, invasive mechanical ventilation or ECMO; moderate  
60

1  
2  
3 271 disease: patients not requiring non-invasive ventilation, high flow oxygen devices, invasive mechanical  
4  
5 272 ventilation nor ECMO). The randomisation list is implemented in the electronic Case Report Form  
6  
7 273 (eCRF) to ensure appropriate allocation concealment.

## 8 274 ***Experimental design***

### 9 275 Study treatments

10  
11  
12 276 The participants are allocated in one of 5 arms (Figure 1).

13  
14 277 Patients included in the remdesivir group receive 200 mg intravenous loading dose on Day 1, followed  
15  
16 278 by a 100 mg once-daily intravenous maintenance dose for the duration of the hospitalization and up to  
17  
18 279 a 10 days' total course. Remdesivir is administered through a 30 to 60 minutes IV infusion.

19  
20 280 Patients included in the lopinavir/ritonavir group receive 400 mg lopinavir and 100 mg ritonavir  
21  
22 281 administered every 12h for 14 days in tablet form. For patients who are unable to take medications by  
23  
24 282 mouth, the lopinavir/ritonavir (400 mg lopinavir/100 mg ritonavir) is administered as a 5-mL suspension  
25  
26 283 every 12h for 14 days via a nasogastric tube.

27  
28 284 Patients included in the lopinavir/ritonavir + interferon  $\beta$ -1a group receive, in addition to  
29  
30 285 lopinavir/ritonavir as described above, interferon  $\beta$ -1a administered subcutaneously at the dose of 44  
31  
32 286  $\mu$ g on Day 1, Day 3, and Day 6 (total of 3 doses). No dosage adjustment is provided for renal or hepatic  
33  
34 287 impairment for IFN- $\beta$ -1a.

35  
36 288 Patients included in the hydroxychloroquine group receive a loading dose of 400 mg twice daily for one  
37  
38 289 day followed by 400 mg once daily for 9 days. The rationale for this loading dose has been published.[6]

39  
40 290 Patients included in the control group receive the standard of care of their recruitment center.  
41  
42 291 Investigational drugs were kindly provided by pharmaceutical firms.

### 43 292 Rationale for study treatments

44  
45 293 Remdesivir (GS-5734) is a broad-spectrum nucleotide prodrug inhibiting RNA-dependent polymerase  
46  
47 294 activity among a diverse group of RNA viruses including filoviruses (e.g. Ebola, Sudan, Marburg),  
48  
49 295 paramyxoviruses (e.g. RSV, Nipah, Hendra) and pathogenic coronaviruses.[7–9] Studies in human  
50  
51 296 airway epithelial cell assays demonstrated that remdesivir inhibits replication of coronaviruses, including  
52  
53 297 MERS-CoV.[10] Remdesivir has shown an *in vitro* activity on SARS-CoV-2[11] and a clinical benefit in  
54  
55 298 rhesus macaques infected with SARS-CoV-2.[12] A large RCT has shown that remdesivir shortened  
56  
57 299 the time to recovery in adults hospitalized with Covid-19 as compared to placebo but the results were  
58  
59 300 not significant for mortality.[13]

1  
2  
3 301 Lopinavir/ritonavir is a fixed-dose combination used in HIV infection that has shown an *in vitro* activity  
4  
5 302 against SARS-CoV in several studies.[14] A structure-based study suggested that the spatial structure  
6  
7 303 of the lopinavir/ritonavir binding site was conserved between SARS-CoV and SARS-CoV-2.[15] The  
8  
9 304 results of an open RCT evaluating lopinavir/ritonavir for COVID-19 were published on March 18,  
10  
11 305 2020.[16] In this trial, adults with confirmed COVID-19 and hypoxemia ( $SpO_2 < 94\%$ ) were randomized  
12  
13 306 to lopinavir/ritonavir (n=99) or standard of care (n=100). No significant difference between the 2 groups  
14  
15 307 was observed on the time to clinical improvement on a 7-item ordinal scale. (HR of improvement 1.31;  
16  
17 308 CI95% 0.95 - 1.80) but a trend to lower mortality rate was observed (19.0% vs. 27.1%) in the 90 patients  
18  
19 309 (45.2% of the total) receiving lopinavir/ritonavir less than 12 days after the beginning of the symptoms.  
20  
21 310 Interferon (IFN)- $\beta$ -1 is a broad-spectrum antiviral drug belonging to the type 1 interferons. Type 1 IFN  
22  
23 311 treatment has shown an activity against MERS-CoV and SARS-CoV in numerous experiments, both *in*  
24  
25 312 *vitro* and *in vivo*. [17–19] Type 1 interferon is currently being tested for MERS-CoV in the MIRACLE  
26  
27 313 clinical trial.[20] SARS-CoV-2 displays *in vitro* a substantial susceptibility to IFN- $\alpha$  [21] and data  
28  
29 314 regarding the potential activity of type 1 interferons on SARS-CoV-2 has been reviewed recently.[22] A  
30  
31 315 RCT found that COVID-19 patients treated with a triple combination interferon beta-1b, lopinavir-  
32  
33 316 ritonavir, and ribavirin had a significantly shorter median time from start of study treatment to negative  
34  
35 317 nasopharyngeal swab (7 days [IQR 5-11]) than the control group up (12 days [8-15]; hazard ratio 4.37  
36  
37 318 [95% CI 1.86-10.24],  $p=0.0010$ ).[23]  
38  
39 319 The *in vitro* antiviral activity of hydroxychloroquine has been known for a long time [24] and was  
40  
41 320 described on a number of viruses including SARS-CoV.[25][26] Regarding COVID-19, recent  
42  
43 321 publications reported an *in vitro* activity of hydroxychloroquine on SARS-CoV-2 [11][27] and non-  
44  
45 322 randomized observational studies provided conflicting clinical results.[28,29] A RCT on postexposure  
46  
47 323 prophylaxis for COVID-19 found that hydroxychloroquine did not prevent illness compatible with Covid-  
48  
49 324 19 or confirmed infection.[30]

### 325 **Participant timeline (Figure 2, Table 1)**

50  
51 326 Clinical evaluations for efficacy and safety are performed at baseline, daily while the patient is  
52  
53 327 hospitalized and at 15 (+/- 2 d) and 29 (+/- 3 d).  
54  
55 328 Upper (nasopharyngeal swab) and/or lower (endotracheal aspiration) respiratory tract and blood  
56  
57 329 samples for centralized analysis of the SARS-CoV-2 kinetics are collected at baseline and at days 3 (+/-  
58  
59 330 1 d), 5 (+/- 1 d), 8 (+/- 1 d), 11 (+/- 1 d), 15 (+/- 2 d) and 29 (+/- 3 d). For each sample, the viral load is  
60



331 measured by a specific SARS-COV-2 real-time (RT)-PCR and normalized according the number of cells  
332 in each sample. This method is validated to monitor viral load kinetics over time and expressed in  
333 standardized unit log of number of viral copies/10 000 cells.

334 Blood samples for pharmacokinetic analysis are collected:

- 335 – For remdesivir, to measure plasma and intracellular concentrations at days 1, 2, 5, 8 and 11;
- 336 – For lopinavir, to measure plasma concentrations at days 1, 3 (+/- 1 d), 6 (+/- 1 d), 8 (+/- 1 d) and  
337 11 (+/- 1 d);
- 338 – For IFN  $\beta$ -1-a, to measure plasma concentrations at days 3 and 6;
- 339 – For hydroxychloroquine, to measure plasma concentrations at days 1, 3 (+/- 1 d), 5 (+/- 1 d), 8  
340 (+/- 1 d) and 11 (+/- 1 d).

341 Thoracic imaging by X-ray or CT scan are performed at baseline, and at days 8 (+/- 1 d), 15 (+/- 2 d)  
342 and 29 (+/- 3 d).

343 Biological evaluations for safety are performed at baseline and at days 3 (+/- 1 d), 5 (+/- 1 d), 8 (+/- 1  
344 d), 11 (+/- 1 d), 15 (+/- 2 d) and 29 (+/- 3 d).

345 A biobank is constituted for ancillary analyses.

#### 346 **Primary endpoint**

347 The primary endpoint is the clinical status at Day 15 on the 7-point ordinal scale of the WHO Master  
348 Protocol (version 3.0, March 3, 2020):

- 349 1. Not hospitalized, no limitation on activities;
- 350 2. Not hospitalized, limitation on activities;
- 351 3. Hospitalized, not requiring supplemental oxygen;
- 352 4. Hospitalized, requiring supplemental oxygen;
- 353 5. Hospitalized, on non-invasive ventilation or high flow oxygen devices;
- 354 6. Hospitalized, on invasive mechanical ventilation or ECMO;
- 355 7. Death.

356 For the scores 1 and 2, limitation of the activities refers to the pre-COVID-19 clinical status, in order to  
357 take into account potential pre-existing limitations.

#### 358 **Secondary endpoints**

359 Secondary endpoints are classified as efficacy or safety endpoints.

#### 360 Efficacy secondary endpoints



- 1  
2  
3 361 1. Ordinal scale  
4  
5 362 - Time to an improvement of one category from admission on an ordinal scale.  
6  
7 363 - Subject clinical status on an ordinal scale on Days 3, 5, 8, 11, and 29.  
8  
9 364 - Mean change in the ranking on an ordinal scale from baseline to Days 3, 5, 8, 11, 15  
10 and 29 from baseline.  
11 365  
12 366 2. National Early Warning Score (NEWS)  
13  
14 367 - The time to discharge or to a NEWS of  $\leq 2$  and maintained for 24 hours, whichever  
15 occurs first.  
16 368  
17  
18 369 - Change from baseline to Days 3, 5, 8, 11, 15, and 29 in NEWS.  
19  
20 370 3. Oxygenation  
21  
22 371 - Oxygenation free days in the first 28 days (to Day 29).  
23  
24 372 - Incidence and duration of new oxygen use, non-invasive ventilation or high flow oxygen  
25 devices during the study.  
26 373  
27  
28 374 4. Mechanical ventilation  
29  
30 375 - Ventilator free days in the first 28 days (to Day 29).  
31  
32 376 - Incidence and duration of new mechanical ventilation use during the study.  
33  
34 377 5. Hospitalization  
35  
36 378 - Duration of hospitalization (days).  
37  
38 379 6. Mortality  
39  
40 380 - In-hospital mortality  
41 381 - 28-day mortality.  
42  
43 382 - 90-day mortality  
44

45 383 Safety secondary endpoints

- 47 384 1. Cumulative incidence of any grade 3 and 4 adverse events;  
48  
49 385 2. Cumulative incidence of any serious adverse event;  
50  
51 386 3. Proportion of patients with a premature discontinuation or temporary suspension of the study  
52 drug, for any reason;  
53 387  
54 388 4. Grade changes in biological parameters, as measured using the Division of AIDS Table for  
55 Grading the Severity of Adult and Pediatric Adverse Events (white cell count, haemoglobin,  
56 389 platelets, creatinine, blood electrolytes (including kaliemia), prothrombin time and international  
57  
58 390  
59  
60

1  
2  
3 391 normalized ratio (INR), glucose, total bilirubin, ALT, and AST) over time.

4  
5 392 Exploratory endpoints

- 6  
7 393 1. Qualitative and quantitative PCR for SARS-CoV-2 normalized according to the number of  
8  
9 394 sample cells in nasopharyngeal or lower respiratory tract samples on days 1, 3, 5, 8, 11, 15  
10  
11 395 and 29;
- 12  
13 396 2. Qualitative and quantitative PCR for SARS-CoV-2 in blood on days 1, 3, 5, 8 and 11;
- 14  
15 397 3. Development of resistance of SARS-CoV-2 in nasopharyngeal or lower respiratory tract  
16  
17 398 samples at days 3, 5, 8, 11, 15 and 29;
- 18  
19 399 4. Whole genome sequencing of participants to identify genetic variants associated with (i) the  
20  
21 400 development of severe clinical disease (ii) the response in terms of safety and efficacy to  
22  
23 401 investigational antiviral drugs;
- 24  
25 402 5. Imagery assessment through chest X-ray or thoracic CT scan on days 1, 8, 15 and 29,  
26  
27 403 depending on availability in centre;
- 28  
29 404 6. Study drugs concentrations, sampled while the participant is hospitalized:
- 30 405 – For remdesivir, as assessed by plasma concentration after the end of infusion on day 1,  
31  
32 406 trough plasma and intracellular concentrations before the 2<sup>nd</sup> dose administration on day  
33  
34 407 2, and trough plasma concentration on days 5 and 8;
  - 35  
36 408 – For lopinavir, peak plasma concentration measured 4 hours after the 1st administration  
37  
38 409 and trough plasma concentrations measured just before the 2nd administration and on  
39  
40 410 days 3, 6, 8 and 11;
  - 41  
42 411 – For IFN  $\beta$ -1-a, trough plasma concentration on days 3 and 6;
  - 43  
44 412 – For hydroxychloroquine, peak plasma concentration measured 4 hours after the 1<sup>st</sup>  
45  
46 413 administration and trough plasma concentrations measured just before the 2<sup>nd</sup>  
47  
48 414 administration and on days 3, 5, 8 and 11.

49 415 **Data collection**

50  
51 416 The trial is conducted in accordance with relevant regulations and standard operating procedures,  
52  
53 417 including data protection. The data are collected on an electronic case report form. Clinical site  
54  
55 418 monitoring is conducted to ensure that the rights are protected and confirm the integrity of collected  
56  
57 419 data. The persons responsible for the quality control of the data take all necessary precautions to ensure  
58  
59  
60

1  
2  
3 420 the confidentiality of information regarding investigational medicinal products, the trial, trial participants  
4  
5 421 and in particular the identity of the participants and the results obtained.

6  
7 422 ***Safety and adverse events monitoring***

8  
9 423 All adverse events are collected regardless of their grade of severity. The choice of continuing therapy  
10  
11 424 is at the discretion of the investigator. All adverse events are classified in grades from mild (grade 1) to  
12  
13 425 life threatening (grade 4) following the DAIDS Table for Grading the Severity of Adult and Pediatric  
14  
15 426 Adverse Events (version 2.1 of July 2017) of the National Institute of Health and National Institute of  
16  
17 427 Allergy and Infectious Diseases of the US Department of Health and Human Services.

18 428 ***Statistical considerations***

19  
20 429 *General considerations*

21  
22 430 Continuous variables will be summarized by the mean, standard deviation, median, interquartile range,  
23  
24 431 minimum and maximum. The change from baseline will be compared using Student's t-test or a  
25  
26 432 Wilcoxon-Mann-Whitney test if the normality assumption does not hold.

27  
28 433 Categorical data will be summarized with the number and proportion of patients. Data will be compared  
29  
30 434 using odds ratios and a Fisher's exact test.

31  
32 435 All statistical tests will be 2-sided with type I error of 0.05. As there are 4 comparisons, each treatment  
33  
34 436 group will be compared to the control group with a two-sided type I error of 0.0125. Subgroup analyses  
35  
36 437 for the primary and secondary endpoints will evaluate the treatment effect across the following  
37  
38 438 subgroups: disease severity at inclusion, geographic region, duration of symptoms prior to enrolment,  
39  
40 439 age and sex. A forest plot will display confidence intervals across subgroups. Interaction tests will be  
41  
42 440 conducted to determine whether the effect of treatment varies by subgroup.

43 441 *Sample size computation*

44  
45 442 A sample size of 3,100 patients (620 patients per arm) is targeted. The sample size was determined  
46  
47 443 assuming the following scenario under standard of care for each item of the ordinal scale: 1: 42%, 2:  
48  
49 444 38%, 3: 8%, 4: 7%, 5: 2%, 6: 1%, 7: 2%.

50  
51 445 There is significant uncertainty with these assumptions given the limited data available. Since a large  
52  
53 446 proportion of patients are moderately ill patients, we power the study for an odds ratio of 1.5 (an odds  
54  
55 447 ratio higher than 1 indicates superiority of the experimental treatment over the control for each ordinal  
56  
57 448 scale category), with 90% power and using an overall one-sided type I error rate of 0.05.[31] Adjusting  
58  
59 449 for multiplicity of 4 pairwise comparisons with the control arm in a 5-arm setting, the (one-sided) false  
60

1  
2  
3 450 positive error rate would be 0.00625, (which requires achieving two-sided  $p=0.0125$ .) The samples size  
4  
5 451 might evolve whenever any treatment arm is withdrawn or added to the trial.

#### 6 7 452 Definition of analysis sets

8  
9 453 The intention-to-treat population is defined as all randomised patients, where patients are analysed in  
10  
11 454 their randomisation group whether they have or not followed the allocated treatment. The modified  
12  
13 455 intention-to-treat population is defined as all randomised patients who did receive at least one dose of  
14  
15 456 the allocated treatment.

16 457 The primary and efficacy secondary analysis will be conducted on the intention-to-treat population.  
17  
18 458 Safety analyses will be based on the modified intention-to-treat population.

#### 19 20 459 Adaptive design

21  
22 460 This study is intended to allow for adaptations with the ability to add a new experimental arm if one  
23  
24 461 becomes available. The current plan is to evaluate the primary endpoint on day 15. If additional data  
25  
26 462 become available to add an experimental therapy, analyses of experimental arms will be performed  
27  
28 463 comparing concurrently enrolled control subjects. If one treatment crosses an efficacy stopping  
29  
30 464 boundary, this treatment may become the new control arm for comparisons. This approach was used in  
31  
32 465 the recent PALM Ebola therapy randomized clinical trial.[32]

#### 33 34 466 Interim analyses

35  
36 467 Interim analyses will be by the independent statistician of the DSMB. There are no formal stopping rules  
37  
38 468 for efficacy or safety. The DSMB will make recommendations taking into consideration the totality of the  
39  
40 469 evidence from the efficacy and safety outcomes as they accumulate, as well as external evidence.

41 470 For efficacy, the statistical analysis will be done on the primary endpoint, the 7-point ordinal scale at 15  
42  
43 471 days, and be based on the Haybittle Peto rule.[33,34] That is, if any active treatment is superior to  
44  
45 472 control at  $P<.001$  then consideration will be given to stopping early for efficacy. This would have major  
46  
47 473 implications; hence the stopping boundary is stringent in the spirit of requiring proof beyond reasonable  
48  
49 474 doubt.

50  
51 475 For futility, i.e. stopping because an active treatment appears ineffective, the statistical analysis will be  
52  
53 476 done with the primary endpoint. Comparing an active treatment with control, if the upper 95% confidence  
54  
55 477 limit for the common odds ratio is less than 1.25 then consideration be given to stopping that treatment  
56  
57 478 for futility. All the above is intended for all randomised patients. Analyses will be stratified by baseline  
58  
59 479 severity of disease. For safety, no pre-specify stopping guideline will be defined because there are  
60

1  
2  
3 480 various aspects of potential harm that could be studied. However, to allow for some caution, any safety  
4  
5 481 signal on SAE, i.e. active treatment worse than control, requires  $P < .01$  to merit consideration of stopping  
6  
7 482 that treatment arm.

### 8 9 483 Final analysis of the primary endpoint

10 484 The primary outcome uses a 7-point ordinal scale analysed using a proportional odds model. This model  
11  
12 485 assumes that the treatment to control odds ratio of being classified in a given severity category “i” or  
13  
14 486 better is the same for each category. The null hypothesis being tested is whether the odds of  
15  
16 487 improvement on the ordinal scale is the same for the control and experimental treatment arms (i.e.,  
17  
18 488 whether the common odds ratio differs is 1). Odds ratios are then interpreted as the odds of being “lower”  
19  
20 489 or “higher” on the ordinal scale across the entire range of the scale. The hypothesis test is, for large  
21  
22 490 sample sizes, nearly the same as the Wilcoxon rank sum test. Therefore, the procedure produces a  
23  
24 491 valid p-value regardless of whether the proportional odds model is correct. Nonetheless, estimation and  
25  
26 492 confidence intervals do require the model to be correct. Accordingly, we will evaluate model fit using a  
27  
28 493 goodness-of-fit likelihood ratio test. The validity of the proportionality assumption will be evaluated and  
29  
30 494 tested. To deal with potential missing data, the last observation will be carried forward until the next  
31  
32 495 available value.

### 33 34 496 Analysis of secondary endpoints

35 497 Differences in time-to-event endpoints by treatment will be summarized with Kaplan-Meier curves and  
36  
37 498 95% confidence interval; and cumulative incidence plots, for time-to-event endpoints with competing  
38  
39 499 risk (e.g. death). Duration of event will be summarized according to median days with quartiles.  
40  
41 500 Incidence data will be summarized as percent with 95% confidence interval. Time-to-event endpoints  
42  
43 501 will be compared using the log-rank test. For time-to-event endpoints with a competing risk Fine and  
44  
45 502 Gray models will be used. All tests will be stratified by the baseline severity.

### 46 47 503 **Committees for the research**

48  
49 504 A DisCoVeRy European Steering Committee (DSC) has been constituted to serve as the governance  
50  
51 505 organ for the trial. It provides the overall supervision of the trial, including for the relations with European  
52  
53 506 stakeholders, the Steering Committee and the Executive Committee of the Solidarity trial (see below).  
54  
55 507 It ensures that the trial is conducted in accordance with ethical principles and respects participants’  
56  
57 508 safety, take any decision on any changes made to the design of the DisCoVeRy trial, and on the  
58  
59 509 reporting of the trial results, including regarding the publication policy.  
60

1  
2  
3 510 An international independent DSMB has been constituted to preserve the interests of trial participants,  
4  
5 511 to monitor the main outcome measures (including safety and efficacy), and to monitor the overall  
6  
7 512 conduct of the trial. Based on interim analyses of the data, it will make recommendations about early  
8  
9 513 study closure or changes to the trial, including adding or removing treatment arms. The DSMB will meet  
10  
11 514 after 100 participants are included into the study, and then every 200 new patients are included, with a  
12  
13 515 maximum of 1 DSMB meeting per week. Other ad hoc reviews will be undertaken if there are specific  
14  
15 516 safety concerns. The study will not stop enrolment awaiting these DSMB reviews, though the DSMB  
16  
17 517 may recommend temporary or permanent cessation of enrolment based on their safety reviews.

### 18 518 ***Intertwinement with WHO Solidarity program***

19  
20 519 Since April 5, 2020, DisCoVeRy has been an add-on trial of the Solidarity program conducted by the  
21  
22 520 WHO in Europe and worldwide. The same treatments are evaluated in DisCoVeRy and in Solidarity.  
23  
24 521 Solidarity has 3 endpoints which are also secondary endpoints of DisCoVeRy: (i) mortality during  
25  
26 522 hospitalization (the primary endpoint of Solidarity) (ii) length of hospital stay and (iii) time to mechanical  
27  
28 523 ventilation or transfer to intensive care. At each DisCoVeRy DSMB meeting, the recommendations will  
29  
30 524 be transmitted to the Data and Safety Monitoring Committee (DSMC) of Solidarity. The Executive  
31  
32 525 Committee of Solidarity will ultimately issue recommendations on the different treatments evaluated,  
33  
34 526 allowing a unique communication on each of the treatments evaluated.

### 35 527 ***Patient and public involvement***

36  
37 528 No patients were involved in the design or implementation of this study.

38  
39 529

## 40 41 530 **DISCUSSION**

### 42 43 531 ***Strengths and limitations of the DisCoVeRy trial design***

44  
45 532 The DisCoVeRy clinical trial is a randomized, open clinical trial that aims to evaluate the safety and  
46  
47 533 efficacy of possible therapeutic agents in hospitalized adult patients diagnosed with COVID-19. The  
48  
49 534 design of DisCoVeRy is adaptive meaning that it can adapt to the ongoing production of evidence and  
50  
51 535 to interim analyses by discontinuing arms that are proved inferior to others, selecting an existing arm as  
52  
53 536 the standard of care if proved superior to others and adding arms if new candidate therapeutic strategies  
54  
55 537 emerge.

56  
57 538 As detailed above, DisCoVeRy is an add-on trial of the Solidarity trial, conducted under the aegis of the  
58  
59 539 WHO in Europe and worldwide. Sharing the data from DisCoVeRy relevant to the Solidarity trial  
60

1  
2  
3 540 (inclusion data and data related to the Solidarity endpoints) increases the number of participants for  
4  
5 541 whom this data is available and thus leads to a faster conclusion on the effectiveness, deleterious effect  
6  
7 542 or ineffectiveness of the treatments evaluated. Inclusion in a same strategy of hospitalized patients with  
8  
9 543 severe (patients requiring non-invasive ventilation, high flow oxygen devices, invasive mechanical  
10  
11 544 ventilation or ECMO) or moderate disease will allow to evaluate the different drug candidates in different  
12  
13 545 clinical situations. Moreover, by including patients at different times in their clinical history of COVID-19,  
14  
15 546 we will be able to study when is the best time to start an antiviral agent in relation to the delay of  
16  
17 547 symptoms. The collection of samples for pharmacological monitoring, viral kinetics and medical imaging  
18  
19 548 will provide crucial data to analyze the PK/PD of evaluated drugs and the effect of treatment on the  
20  
21 549 virological and radiological evolution. However, DisCoVeRy will not provide data on treatments for  
22  
23 550 COVID-19 at an early phase, before there is a need for hospitalization. As only antiviral agents are  
24  
25 551 evaluated in DisCoVeRy, we will not be able to evaluate the efficacy of immunomodulatory agents,  
26  
27 552 including corticosteroids.

28 553

#### 30 554 ***Strengths and limitations of real-time interventional research in the setting of a pandemic***

31  
32 555 Discovery is not a placebo-controlled trial and is not double-blind because of the complexity of blinding  
33  
34 556 treatments with different mode of administration (intravenous, sub-cutaneous or oral) and the need to  
35  
36 557 initiate the trial very rapidly. Moreover, in a recent meta-epidemiological study, no evidence was found  
37  
38 558 that lack of blinding of patients, healthcare providers, or outcome assessors had an impact on effect  
39  
40 559 estimates in randomised clinical trials.[35]

41  
42 560 Integrating clinical trials of experimental therapeutics is an increasingly recognized part of the response  
43  
44 561 during infectious disease outbreaks. Since the Ebola outbreak in West Africa and subsequent outbreaks  
45  
46 562 in the Democratic Republic of Congo, clinical trials of investigative drugs have been fully integrated in  
47  
48 563 the epidemic response.[36–38] Implementing large clinical trial is both direly needed and particularly  
49  
50 564 challenging during a pandemic. Indeed, the pandemic context compels us to organize clinical trials  
51  
52 565 urgently while keeping methodological requirements of the highest level which is the only way to provide  
53  
54 566 reliable answers for clinicians. The selection of the best candidate drugs for a new outbreak is a major  
55  
56 567 challenge and a strength of the DisCoVeRy trial is that its adaptive design allows to add new arms if  
57  
58 568 good evidence emerges while the trial is continuing that some other treatment(s) should also be  
59  
60 569 evaluated. The ever-changing scientific background supporting the use of each candidate treatment



1  
2  
3 570 should be clear, detailed and regularly updated. Transparency, consistency and quality of design are  
4  
5 571 more crucial than ever during pandemics to provide relevant and reliable data.

6  
7 572 **DISSEMINATION**

8  
9 573 Results will be communicated at scientific meetings and submitted for publication in peer-reviewed  
10  
11 574 journals.

12  
13 575 **TRIAL STATUS**

14  
15 576 This trial has begun on March 22, 2020. On June 8, 2020, 754 patients have been included.

16  
17 577

18  
19 578

20  
21  
22  
23  
24  
25  
26  
27  
28  
29  
30  
31  
32  
33  
34  
35  
36  
37  
38  
39  
40  
41  
42  
43  
44  
45  
46  
47  
48  
49  
50  
51  
52  
53  
54  
55  
56  
57  
58  
59  
60

For peer review only



579 **Figure 1.** DisCoVeRy trial arms, drugs and dosing schedule

580 **Figure 2.** Schematic representation of the experimental design of the DisCoVeRy clinical trial.

581 **Table 1.** Schedule of enrolment, interventions and assessment in the DisCoVeRy trial

| Day +/- Window                                                                       | Screening | Baseline <sup>1</sup> | D1 | D2-D14 <sup>2</sup>                                                                                                  | D15 <sup>2</sup><br>± 2 | D29 <sup>2</sup><br>± 3 | D90 |
|--------------------------------------------------------------------------------------|-----------|-----------------------|----|----------------------------------------------------------------------------------------------------------------------|-------------------------|-------------------------|-----|
| <b>ELIGIBILITY</b>                                                                   |           |                       |    |                                                                                                                      |                         |                         |     |
| Informed consent                                                                     | X         |                       |    |                                                                                                                      |                         |                         |     |
| Demographics & Medical History                                                       | X         |                       |    |                                                                                                                      |                         |                         |     |
| EKG                                                                                  | X         |                       |    |                                                                                                                      |                         |                         |     |
| Review SARS-CoV-2 results                                                            | X         |                       |    |                                                                                                                      |                         |                         |     |
| <b>STUDY INTERVENTION</b>                                                            |           |                       |    |                                                                                                                      |                         |                         |     |
| Randomization                                                                        |           | X                     |    |                                                                                                                      |                         |                         |     |
| Standard of Care (SoC)                                                               |           |                       |    |                                                                                                                      |                         |                         |     |
| Or SoC plus administration of Lopinavir/ritonavir                                    |           |                       |    | Lopinavir/ritonavir for 14 days                                                                                      |                         |                         |     |
| Or SoC plus administration of Lopinavir/ritonavir in association with Interferon β1a |           |                       |    | Lopinavir/ritonavir for 14 days<br>Interferon β-1a day 1, day 3<br>day 6 or until discharge (after at least 2 doses) |                         |                         |     |
| Or SoC plus administration of remdesivir                                             |           |                       |    | Daily administration until discharge (after at least 5 days) or day 10                                               |                         |                         |     |
| Or SoC plus administration of hydroxychloroquine                                     |           |                       |    | Daily administration until day 10                                                                                    |                         |                         |     |
| <b>STUDY PROCEDURES</b>                                                              |           |                       |    |                                                                                                                      |                         |                         |     |
| Vital signs including SpO <sub>2</sub>                                               |           | X                     | X  | Daily until discharge                                                                                                | X                       | X                       |     |
| Clinical data collection                                                             |           | X                     | X  | Daily until discharge                                                                                                | X                       | X                       | X   |

1  
2  
3  
4  
5  
6  
7  
8  
9  
10  
11  
12  
13  
14  
15  
16  
17  
18  
19  
20  
21  
22  
23  
24  
25  
26  
27  
28  
29  
30  
31  
32  
33  
34  
35  
36  
37  
38  
39  
40  
41  
42  
43  
44  
45  
46  
47  
48  
49  
50  
51  
52  
53  
54  
55  
56  
57  
58  
59  
60

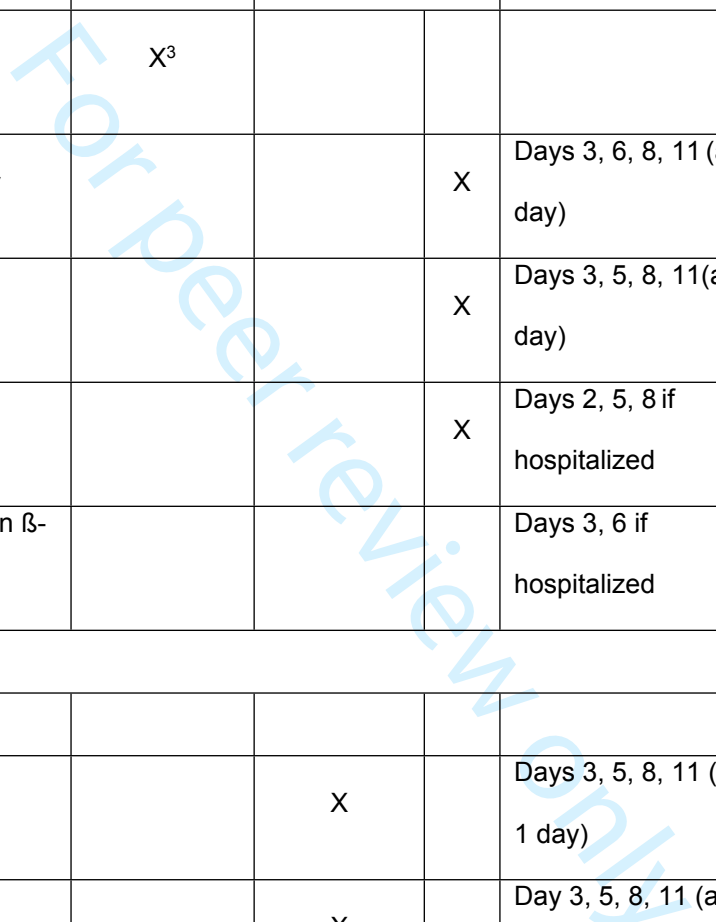

|                                                        |                |                |   |                                |   |   |   |
|--------------------------------------------------------|----------------|----------------|---|--------------------------------|---|---|---|
| Electrocardiogram (EKG) <sup>5</sup>                   | X              |                |   | Days 3, 5, 8                   |   |   |   |
| Medication review                                      | X              |                | X | Daily until discharge          | X | X |   |
| Adverse event evaluation                               |                |                | X | Daily until discharge          | X | X | X |
| <b>SAFETY LABORATORY</b>                               |                |                |   |                                |   |   |   |
| Safety haematology, chemistry and liver tests          | X <sup>3</sup> | X <sup>4</sup> |   | Days 3, 5, 8, 11 (all ± 1 day) | X | X |   |
| Pregnancy test for females of childbearing potential   | X <sup>3</sup> |                |   |                                | X | X |   |
| Plasma concentration of lopinavir                      |                |                | X | Days 3, 6, 8, 11 (all ± 1 day) |   |   |   |
| Plasma concentration of hydroxychloroquine             |                |                | X | Days 3, 5, 8, 11(all ± 1 day)  |   |   |   |
| Plasma and intracellular concentration of remdesivir   |                |                | X | Days 2, 5, 8 if hospitalized   |   |   |   |
| Plasma concentration of interferon β-1a                |                |                |   | Days 3, 6 if hospitalized      |   |   |   |
| <b>RESEARCH LABORATORY</b>                             |                |                |   |                                |   |   |   |
| Blood for serum (serum bank)                           |                | X              |   | Days 3, 5, 8, 11 (all ± 1 day) | X | X |   |
| Plasma for PCR SARS-CoV-2                              |                | X              |   | Day 3, 5, 8, 11 (all ± 1 day)  |   |   |   |
| Whole blood for blood bank                             |                | X              |   |                                |   |   |   |
| Nasopharyngeal swab or lower respiratory tract samples |                | X              |   | Day 3, 5, 8, 11 (all ± 1 day)  | X | X |   |
| Thoracic CT scan or chest x-ray                        |                | X              |   | Day 8 (± 1 day)                | X | X |   |
| Whole blood for genetic analysis                       |                | X              |   |                                |   |   |   |

582 1. Baseline assessments should be performed prior to study drug administration

1  
2  
3  
4  
5  
6  
7  
8  
9  
10  
11  
12  
13  
14  
15  
16  
17  
18  
19  
20  
21  
22  
23  
24  
25  
26  
27  
28  
29  
30  
31  
32  
33  
34  
35  
36  
37  
38  
39  
40  
41  
42  
43  
44  
45  
46  
47  
48  
49  
50  
51  
52  
53  
54  
55  
56  
57  
58  
59  
60

- 583 2. *If discharged from the hospital, visits and safety assessments are conducted in the outpatient*
- 584 *setting.*
- 585 3. *Laboratory tests performed in the 48 hours prior to enrolment are accepted for determination of*
- 586 *eligibility.*
- 587 4. *Any laboratory tests performed in the 24 hours before randomization can be used for baseline and*
- 588 *Day 1*
- 589

For peer review only

590

591 **REFERENCES**

- 592 1 Drosten C, Günther S, Preiser W, *et al.* Identification of a novel coronavirus in patients with  
593 severe acute respiratory syndrome. *N Engl J Med* 2003;**348**:1967–76. doi:10.1056/NEJMoa030747
- 594 2 Ksiazek TG, Erdman D, Goldsmith CS, *et al.* A novel coronavirus associated with severe  
595 acute respiratory syndrome. *N Engl J Med* 2003;**348**:1953–66. doi:10.1056/NEJMoa030781
- 596 3 Zaki AM, van Boheemen S, Bestebroer TM, *et al.* Isolation of a novel coronavirus from a man  
597 with pneumonia in Saudi Arabia. *N Engl J Med* 2012;**367**:1814–20. doi:10.1056/NEJMoa1211721
- 598 4 World Health Organization. WHO characterizes COVID-19 as a pandemic.  
599 2020.<https://www.who.int/emergencies/diseases/novel-coronavirus-2019/events-as-they-happen>  
600 (accessed 14 Mar 2020).
- 601 5 World Health Organization. WHO R&D Blueprint novel Coronavirus COVID-19 Therapeutic  
602 Trial Synopsis. 2020.[https://www.who.int/blueprint/priority-diseases/key-action/COVID-](https://www.who.int/blueprint/priority-diseases/key-action/COVID-19_Treatment_Trial_Design_Master_Protocol_synopsis_Final_18022020.pdf)  
603 [19\\_Treatment\\_Trial\\_Design\\_Master\\_Protocol\\_synopsis\\_Final\\_18022020.pdf](https://www.who.int/blueprint/priority-diseases/key-action/COVID-19_Treatment_Trial_Design_Master_Protocol_synopsis_Final_18022020.pdf) (accessed 10 Mar  
604 2020).
- 605 6 Lê MP, Peiffer-Smadja N, Guedj J, *et al.* Rationale of a loading dose initiation for  
606 hydroxychloroquine treatment in COVID-19 2 infection in DisCoVeRy trial. *Journal of Antimicrobial*  
607 *Chemotherapy*; **In press**.
- 608 7 Lo MK, Jordan R, Arvey A, *et al.* GS-5734 and its parent nucleoside analog inhibit Filo-,  
609 Pneumo-, and Paramyxoviruses. *Sci Rep* 2017;**7**:43395. doi:10.1038/srep43395
- 610 8 Lo MK, Feldmann F, Gary JM, *et al.* Remdesivir (GS-5734) protects African green monkeys  
611 from Nipah virus challenge. *Sci Transl Med* 2019;**11**. doi:10.1126/scitranslmed.aau9242
- 612 9 Warren TK, Jordan R, Lo MK, *et al.* Therapeutic efficacy of the small molecule GS-5734  
613 against Ebola virus in rhesus monkeys. *Nature* 2016;**531**:381–5. doi:10.1038/nature17180
- 614 10 Sheahan TP, Sims AC, Graham RL, *et al.* Broad-spectrum antiviral GS-5734 inhibits both  
615 epidemic and zoonotic coronaviruses. *Sci Transl Med* 2017;**9**. doi:10.1126/scitranslmed.aal3653
- 616 11 Wang M, Cao R, Zhang L, *et al.* Remdesivir and chloroquine effectively inhibit the recently  
617 emerged novel coronavirus (2019-nCoV) in vitro. *Cell Res* 2020;**30**:269–71. doi:10.1038/s41422-020-  
618 0282-0
- 619 12 Williamson BN, Feldmann F, Schwarz B, *et al.* Clinical benefit of remdesivir in rhesus

- 1  
2  
3 620 macaques infected with SARS-CoV-2. *bioRxiv* 2020;:2020.04.15.043166.  
4  
5 621 doi:10.1101/2020.04.15.043166  
6  
7 622 13 Beigel JH, Tomashek KM, Dodd LE, *et al.* Remdesivir for the Treatment of Covid-19 -  
8  
9 623 Preliminary Report. *N Engl J Med* Published Online First: 22 May 2020. doi:10.1056/NEJMoa2007764  
10  
11 624 14 Groneberg DA, Poutanen SM, Low DE, *et al.* Treatment and vaccines for severe acute  
12  
13 625 respiratory syndrome. *Lancet Infect Dis* 2005;**5**:147–55. doi:10.1016/S1473-3099(05)01307-1  
14  
15 626 15 Liu X, Wang X-J. Potential inhibitors for 2019-nCoV coronavirus M protease from clinically  
16  
17 627 approved medicines. *bioRxiv* 2020;:2020.01.29.924100. doi:10.1101/2020.01.29.924100  
18  
19 628 16 Cao B, Wang Y, Wen D, *et al.* A Trial of Lopinavir-Ritonavir in Adults Hospitalized with Severe  
20  
21 629 Covid-19. *N Engl J Med* Published Online First: 18 March 2020. doi:10.1056/NEJMoa2001282  
22  
23 630 17 Stockman LJ, Bellamy R, Garner P. SARS: systematic review of treatment effects. *PLoS Med*  
24  
25 631 2006;**3**:e343. doi:10.1371/journal.pmed.0030343  
26  
27 632 18 Sheahan TP, Sims AC, Leist SR, *et al.* Comparative therapeutic efficacy of remdesivir and  
28  
29 633 combination lopinavir, ritonavir, and interferon beta against MERS-CoV. *Nat Commun* 2020;**11**:1–14.  
30  
31 634 doi:10.1038/s41467-019-13940-6  
32  
33 635 19 Chan JF-W, Yao Y, Yeung M-L, *et al.* Treatment With Lopinavir/Ritonavir or Interferon-beta1b  
34  
35 636 Improves Outcome of. *J Infect Dis* 2015;**212**:1904–13. doi:10.1093/infdis/jiv392  
36  
37 637 20 Arabi YM, Allothman A, Balkhy HH, *et al.* Treatment of Middle East Respiratory Syndrome with  
38  
39 638 a combination of lopinavir-ritonavir and interferon-β1b (MIRACLE trial): study protocol for a  
40  
41 639 randomized controlled trial. *Trials* 2018;**19**:81. doi:10.1186/s13063-017-2427-0  
42  
43 640 21 Lokugamage KG, Hage A, Schindewolf C, *et al.* SARS-CoV-2 is sensitive to type I interferon  
44  
45 641 pretreatment. *bioRxiv* 2020;:2020.03.07.982264. doi:10.1101/2020.03.07.982264  
46  
47 642 22 Sallard E, Lescure F-X, Yazdanpanah Y, *et al.* Type 1 interferons as a potential treatment  
48  
49 643 against COVID-19. *Antiviral Res* 2020;**178**:104791. doi:10.1016/j.antiviral.2020.104791  
50  
51 644 23 Hung IF-N, Lung K-C, Tso EY-K, *et al.* Triple combination of interferon beta-1b, lopinavir-  
52  
53 645 ritonavir, and ribavirin in the treatment of patients admitted to hospital with COVID-19: an open-label,  
54  
55 646 randomised, phase 2 trial. *Lancet* 2020;**395**:1695–704. doi:10.1016/S0140-6736(20)31042-4  
56  
57 647 24 Miller DK, Lenard J. Antihistaminics, local anesthetics, and other amines as antiviral agents.  
58  
59 648 *PNAS* 1981;**78**:3605–9. doi:10.1073/pnas.78.6.3605  
60  
60 649 25 Keyaerts E, Vijgen L, Maes P, *et al.* In vitro inhibition of severe acute respiratory syndrome

- 1  
2  
3 650 coronavirus by chloroquine. *Biochemical and Biophysical Research Communications* 2004;**323**:264–8.  
4  
5 651 doi:10.1016/j.bbrc.2004.08.085  
6  
7 652 26 Rolain J-M, Colson P, Raoult D. Recycling of chloroquine and its hydroxyl analogue to face  
8  
9 653 bacterial, fungal and viral infections in the 21st century. *Int J Antimicrob Agents* 2007;**30**:297–308.  
10  
11 654 doi:10.1016/j.ijantimicag.2007.05.015  
12  
13 655 27 Liu J, Cao R, Xu M, *et al.* Hydroxychloroquine, a less toxic derivative of chloroquine, is  
14  
15 656 effective in inhibiting SARS-CoV-2 infection in vitro. *Cell Discov* 2020;**6**:1–4. doi:10.1038/s41421-020-  
16  
17 657 0156-0  
18  
19 658 28 Taccone FS, Gorham J, Vincent J-L. Hydroxychloroquine in the management of critically ill  
20  
21 659 patients with COVID-19: the need for an evidence base. *The Lancet Respiratory Medicine* 2020;**0**.  
22  
23 660 doi:10.1016/S2213-2600(20)30172-7  
24  
25 661 29 Geleris J, Sun Y, Platt J, *et al.* Observational Study of Hydroxychloroquine in Hospitalized  
26  
27 662 Patients with Covid-19. *New England Journal of Medicine* 2020;**0**:null. doi:10.1056/NEJMoa2012410  
28  
29 663 30 Boulware DR, Pullen MF, Bangdiwala AS, *et al.* A Randomized Trial of Hydroxychloroquine as  
30  
31 664 Postexposure Prophylaxis for Covid-19. *N Engl J Med* Published Online First: 3 June 2020.  
32  
33 665 doi:10.1056/NEJMoa2016638  
34  
35 666 31 Whitehead J. Sample size calculations for ordered categorical data. *Stat Med* 1993;**12**:2257–  
36  
37 667 71. doi:10.1002/sim.4780122404  
38  
39 668 32 Mulangu S, Dodd LE, Davey RT, *et al.* A Randomized, Controlled Trial of Ebola Virus Disease  
40  
41 669 Therapeutics. *N Engl J Med* 2019;**381**:2293–303. doi:10.1056/NEJMoa1910993  
42  
43 670 33 Haybittle JL. Repeated assessment of results in clinical trials of cancer treatment. *Br J Radiol*  
44  
45 671 1971;**44**:793–7. doi:10.1259/0007-1285-44-526-793  
46  
47 672 34 Peto R, Pike MC, Armitage P, *et al.* Design and analysis of randomized clinical trials requiring  
48  
49 673 prolonged observation of each patient. I. Introduction and design. *Br J Cancer* 1976;**34**:585–612.  
50  
51 674 doi:10.1038/bjc.1976.220  
52  
53 675 35 Moustgaard H, Clayton GL, Jones HE, *et al.* Impact of blinding on estimated treatment effects  
54  
55 676 in randomised clinical trials: meta-epidemiological study. *BMJ* 2020;**368**. doi:10.1136/bmj.l6802  
56  
57 677 36 Nakkazi E. Randomised controlled trial begins for Ebola therapeutics. *Lancet* 2018;**392**:2338.  
58  
59 678 doi:10.1016/S0140-6736(18)33011-3  
60  
60 679 37 Sissoko D, Laouenan C, Folkesson E, *et al.* Experimental Treatment with Favipiravir for Ebola

1  
2  
3 680 Virus Disease (the JIKI Trial): A Historically Controlled, Single-Arm Proof-of-Concept Trial in Guinea.

4  
5 681 *PLoS Med* 2016;**13**:e1001967. doi:10.1371/journal.pmed.1001967

6  
7 682 38 Fallah MP, Skrip LA. Edibola therapies: an unconventionally calculated risk. *Lancet*

8  
9 683 2019;**393**:850–2. doi:10.1016/S0140-6736(19)30160-6

10  
11 684  
12  
13  
14  
15  
16  
17  
18  
19  
20  
21  
22  
23  
24  
25  
26  
27  
28  
29  
30  
31  
32  
33  
34  
35  
36  
37  
38  
39  
40  
41  
42  
43  
44  
45  
46  
47  
48  
49  
50  
51  
52  
53  
54  
55  
56  
57  
58  
59  
60

For peer review only

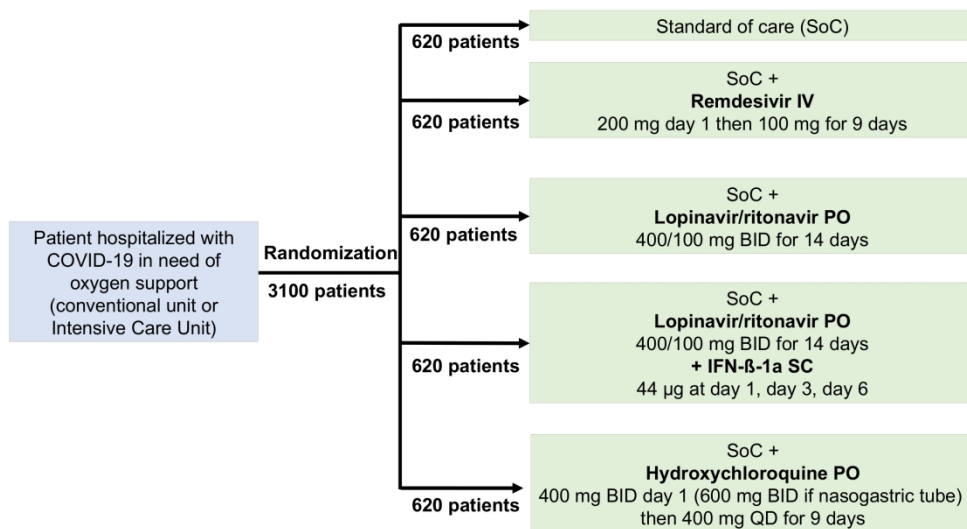

DisCoVeRy trial arms, drugs and dosing schedule

940x529mm (72 x 72 DPI)



1  
2  
3  
4  
5  
6  
7  
8  
9  
10  
11  
12  
13  
14  
15  
16  
17  
18  
19  
20  
21  
22  
23  
24  
25  
26  
27  
28  
29  
30  
31  
32  
33  
34  
35  
36  
37  
38  
39  
40  
41  
42  
43  
44  
45  
46  
47  
48  
49  
50  
51  
52  
53  
54  
55  
56  
57  
58  
59  
60

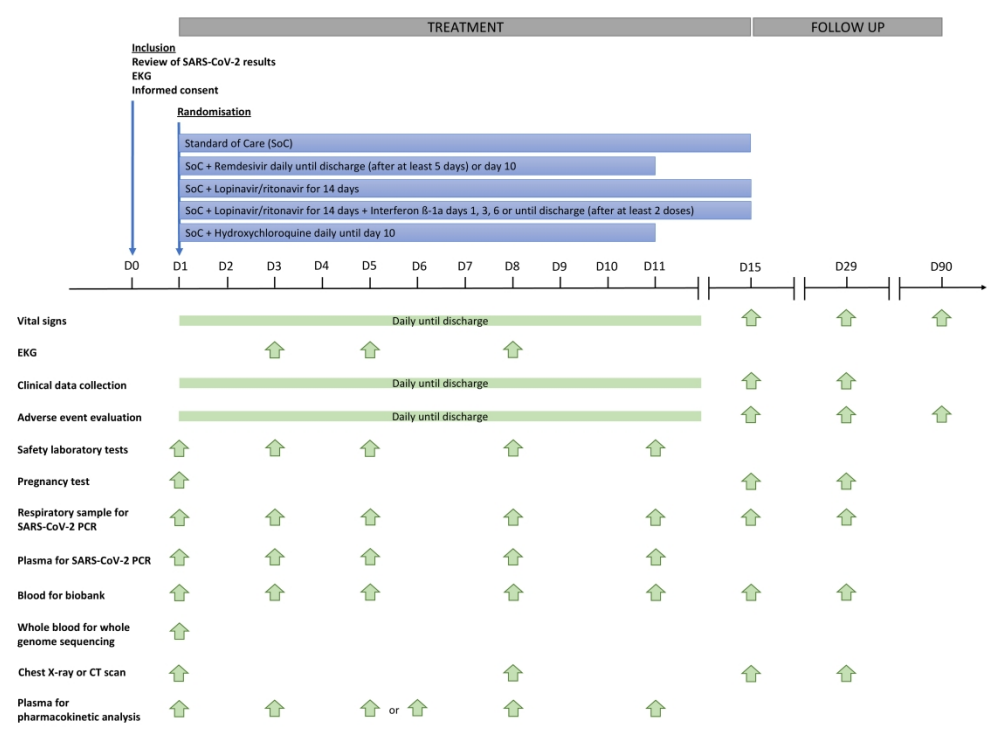

Schematic representation of the experimental design of the DisCoVeRy clinical trial.

419x299mm (300 x 300 DPI)

# BMJ Open

## Protocol for the DisCoVeRy trial: multi-centre, adaptive, randomized trial of the safety and efficacy of treatments for COVID-19 in hospitalized adults

|                                 |                                                                                                                                                                 |
|---------------------------------|-----------------------------------------------------------------------------------------------------------------------------------------------------------------|
| Journal:                        | <i>BMJ Open</i>                                                                                                                                                 |
| Manuscript ID                   | bmjopen-2020-041437.R1                                                                                                                                          |
| Article Type:                   | Protocol                                                                                                                                                        |
| Date Submitted by the Author:   | 14-Aug-2020                                                                                                                                                     |
| Complete List of Authors:       | Ader, Florence; Centre Hospitalier Universitaire de Lyon,                                                                                                       |
| <b>Primary Subject Heading</b>: | Infectious diseases                                                                                                                                             |
| Secondary Subject Heading:      | Respiratory medicine, Pharmacology and therapeutics, Immunology (including allergy), Intensive care                                                             |
| Keywords:                       | Clinical trials < THERAPEUTICS, INFECTIOUS DISEASES, Respiratory infections < THORACIC MEDICINE, Public health < INFECTIOUS DISEASES, INTENSIVE & CRITICAL CARE |
|                                 |                                                                                                                                                                 |

SCHOLARONE™  
Manuscripts



I, the Submitting Author has the right to grant and does grant on behalf of all authors of the Work (as defined in the below author licence), an exclusive licence and/or a non-exclusive licence for contributions from authors who are: i) UK Crown employees; ii) where BMJ has agreed a CC-BY licence shall apply, and/or iii) in accordance with the terms applicable for US Federal Government officers or employees acting as part of their official duties; on a worldwide, perpetual, irrevocable, royalty-free basis to BMJ Publishing Group Ltd ("BMJ") its licensees and where the relevant Journal is co-owned by BMJ to the co-owners of the Journal, to publish the Work in this journal and any other BMJ products and to exploit all rights, as set out in our [licence](#).

The Submitting Author accepts and understands that any supply made under these terms is made by BMJ to the Submitting Author unless you are acting as an employee on behalf of your employer or a postgraduate student of an affiliated institution which is paying any applicable article publishing charge ("APC") for Open Access articles. Where the Submitting Author wishes to make the Work available on an Open Access basis (and intends to pay the relevant APC), the terms of reuse of such Open Access shall be governed by a Creative Commons licence – details of these licences and which [Creative Commons](#) licence will apply to this Work are set out in our licence referred to above.

Other than as permitted in any relevant BMJ Author's Self Archiving Policies, I confirm this Work has not been accepted for publication elsewhere, is not being considered for publication elsewhere and does not duplicate material already published. I confirm all authors consent to publication of this Work and authorise the granting of this licence.

**1 TITLE**

2 **Protocol for the DisCoVeRy trial: multi-centre, adaptive, randomized trial of the safety and**  
3 **efficacy of treatments for COVID-19 in hospitalized adults**

**5 AUTHORS**

6 **Florence Ader on behalf of The DisCoVeRy French Trial Management Team**

**8 CORRESPONDING AUTHOR:**

9 Florence Ader, M.D., Ph.D. Département des Maladies infectieuses et tropicales, Hôpital de la Croix-  
10 Rousse, Hospices Civils de Lyon, Lyon, France. ☎: +33 (0)472 071 560; 📠: +33 (0)472 072 441; ✉:  
11 [florence.ader@chu-lyon.fr](mailto:florence.ader@chu-lyon.fr)

**13 KEYWORDS**

14 COVID-19; SARS-CoV-2; Randomized clinical trial; Efficacy; Safety; Type 1 interferon; Remdesivir;  
15 Lopinavir/ritonavir; Hydroxychloroquine;

18 **Text count: 4777 words**

**20 ABSTRACT****21 Introduction**

22 To find effective and safe treatments for COVID-19, the WHO recommended to systemically evaluate  
23 experimental therapeutics in collaborative randomized clinical trials. As COVID-19 was spreading in  
24 Europe, the French national institute for Health and Medical Research (Inserm) established a trans-  
25 disciplinary team to develop a multi-arm randomized controlled trial named DisCoVeRy. The objective  
26 of the trial is to evaluate the clinical efficacy and safety of different investigational repurposed  
27 therapeutics relative to Standard of Care (SoC) in patients hospitalized with COVID-19.

**28 Methods and analysis**

29 DisCoVeRy is a phase III, open-label, adaptive, controlled, multicentre clinical trial in which hospitalized  
30 patients with COVID-19 in need of oxygen therapy are randomized between 5 arms: (i) a control group

1  
2  
3 31 managed with SoC and four therapeutic arms with repurposed antiviral agents: (ii) remdesivir + SoC,  
4  
5 32 (iii) lopinavir/ritonavir + SoC, (iv) lopinavir/ritonavir associated with interferon (IFN)- $\beta$ -1a + SoC and (v)  
6  
7 33 hydroxychloroquine + SoC. The primary endpoint is the clinical status at Day 15 on the 7-point ordinal  
8  
9 34 scale of the WHO Master Protocol (version 3.0, March 3, 2020). This trial involves patients hospitalized  
10  
11 35 in conventional departments or intensive care units both from academic or non-academic hospitals  
12  
13 36 throughout Europe. A sample size of 3,100 patients (620 patients per arm) is targeted. This trial has  
14  
15 37 begun on March 22, 2020. Since April 5, 2020, DisCoVeRy has been an add-on trial of the Solidarity  
16  
17 38 consortium of trials conducted by the WHO in Europe and worldwide. On June 8, 2020, 754 patients  
18  
19 39 have been included.

#### 20 40 **Ethics and dissemination**

21  
22 41 Inserm is the sponsor of DisCoVeRy. Ethical approval has been obtained from the institutional review  
23  
24 42 board on March 13, 2020 (20.03.06.51744) and from the French National Agency for Medicines and  
25  
26 43 Health Products (ANSM) on March 9, 2020. Results will be submitted for publication in peer-reviewed  
27  
28 44 journals.

#### 29 45 **Trial registration number**

30  
31  
32 46 NCT04315948 Eudra-CT 2020-000936-23  
33  
34  
35  
36  
37  
38  
39  
40  
41  
42  
43  
44  
45  
46  
47  
48  
49  
50  
51  
52  
53  
54  
55  
56  
57  
58  
59  
60

1  
2  
3 47 **ARTICLE SUMMARY**

4  
5 48 **STRENGTHS AND LIMITATIONS OF THIS STUDY**

6  
7 49 . The DisCoVeRy clinical trial is an adaptive, randomized, open-label clinical trial that aims to evaluate  
8  
9 50 the safety and efficacy of 4 antiviral therapeutic strategies as compared to standard of care in  
10  
11 51 hospitalized adult patients diagnosed with COVID-19.

12  
13 52 . Therapeutic strategies can be modified according to new evidence: an arm can become the  
14  
15 53 standard of care if proved superior to others, arms can be discontinued if proved inferior to others  
16  
17 54 and arms can be added if new candidate therapeutic strategies emerge.

18  
19 55 . DisCoVeRy is an add-on trial of the Solidarity consortium of trials, conducted under the aegis of the  
20  
21 56 WHO and data on common endpoints are shared with the Solidarity consortium.

22  
23 57 . DisCoVeRy is not a placebo-controlled trial and is not double-blind because of the complexity of  
24  
25 58 blinding treatments with different mode of administration (intravenous, sub-cutaneous or oral) and  
26  
27 59 the need to initiate the trial very rapidly.

28  
29 60 . DisCoVeRy includes patients who are hospitalized in need of oxygen therapy, it does not target  
30  
31 61 patients at the early phase of the disease nor include anti-inflammatory agents that can be used as  
32  
33 62 part of the standard of care in any arm.

34 63  
35  
36  
37  
38  
39  
40  
41  
42  
43  
44  
45  
46  
47  
48  
49  
50  
51  
52  
53  
54  
55  
56  
57  
58  
59  
60

## 64 INTRODUCTION

### 65 **Background and scope**

66 Severe acute respiratory syndrome coronavirus 2 (SARS-CoV-2) is the third coronavirus that has  
67 crossed the species barrier to cause deadly pneumonia in humans since the beginning of the 21st  
68 century, after SARS-CoV [1,2] and Middle-East respiratory syndrome coronavirus [3] (MERS-CoV) in  
69 2002 and 2012, respectively. The first case of infection with the SARS-CoV-2 was reported in the city  
70 of Wuhan, China on December 31, 2019. The associated disease was named “coronavirus disease  
71 2019” (abbreviated “COVID-19”). The emergence and the spread of SARS-CoV-2 is an unprecedented  
72 challenge, vividly illustrating the pace at which a viral outbreak can progress among a highly interlinked  
73 and susceptible global population. At the beginning of March 2020, when this clinical trial was designed,  
74 COVID-19 had spread to more than 100 countries and affected more than 100,000 individuals.  
75 Consistently, the World Health Organization (WHO) declared COVID-19 pandemic on March 11,  
76 2020.[4]

77 Although many drugs have *in vitro* activity against various coronaviruses, no clinical evidence at that  
78 time supported the efficacy and safety of any drug against any coronavirus in humans, including SARS-  
79 CoV-2. The rapid and simultaneous combination of supportive care and randomized controlled trials  
80 (RCT) is the only way to find effective and safe treatments for COVID-19 that could improve patients'  
81 management. WHO thus recommended researchers around the world to systemically evaluate  
82 experimental therapeutics in RCT and to gather initiatives in large trials that could provide strong  
83 evidence about which treatment are safe and effective.

84 As COVID-19 was spreading in Europe, the French national institute for Health and Medical Research  
85 (Inserm) established a trans-disciplinary team to develop a multi-arm randomized controlled trial to  
86 rapidly provide reliable evidence about the efficacy and safety of therapeutics in comparison to a  
87 standard of care control arm. The WHO Master Protocol for therapeutics against COVID-19 version 3.0  
88 (March 3, 2020) published by the WHO R&D Blueprint Working Group [5] was used as a template for  
89 this clinical trial. Subsequently, the DisCoVeRy trial was launched in France in March 22, 2020.  
90 International cooperation being essential in outbreak science and public health, and in actions to prevent  
91 trans-frontier disease progression, the DisCoVeRy trial intends to bring together several European  
92 countries.

### 93 **Objective**

1  
2  
3 94 The objective of the DisCoVeRy trial is to evaluate the clinical efficacy and safety of different  
4  
5 95 investigational therapeutics relative to Standard of Care (SoC) in patients hospitalized with COVID-19.

## 6 7 96 **METHODS AND ANALYSIS**

### 8 9 97 ***Design and general information***

10  
11 98 DisCoVeRy is a phase III, open-label, adaptive, randomized, controlled, multicenter clinical trial  
12  
13 99 designed to evaluate the safety and efficacy of repurposed therapeutic interventions in hospitalized adult  
14  
15 100 patients diagnosed with COVID-19. This trial involves patients both from academic or non-academic  
16  
17 101 hospitals throughout Europe, with Inserm as the sponsor. Study sites can be obtained from the sponsor's  
18  
19 102 representative (contact: helene.esperou@inserm.fr). The protocol described in this article is the version  
20  
21 103 7.0 of the DisCoVeRy protocol approved on April 5.

22  
23 104 The DisCoVeRy RCT has 5 arms: (i) a control group managed SoC and four therapeutic arms with  
24  
25 105 repurposed antiviral agents: (ii) remdesivir + SoC, (iii) lopinavir/ritonavir + SoC, (iv) lopinavir/ritonavir  
26  
27 106 associated with interferon (IFN)- $\beta$ -1a + SoC and (v) hydroxychloroquine + SoC (Figure 1). The arms  
28  
29 107 have not been modified between the version 1 and 7 of the protocol. Included participants cannot be  
30  
31 108 treated with antivirals other than the study medications allocated by randomization, but non-antiviral  
32  
33 109 drugs such as steroids, immunomodulatory agents (e.g. anti-interleukin 6 drugs), or antibiotics can be  
34  
35 110 used as part of the standard of care. This is an open-label trial but all investigators are unaware of  
36  
37 111 aggregate outcomes during the study. The design is adaptive upon decision of the DSMB: arms can be  
38  
39 112 discontinued if proved inferior to others, an existing arm can become the standard of care if proved  
40  
41 113 superior and arms can be added if new candidate therapeutic strategies emerge. The trial has been  
42  
43 114 registered at the ClinicalTrials.org registry as NCT04315948 and on the European Clinical Trials  
44  
45 115 Database as 2020-000936-23.

### 46 47 116 ***Participants***

48  
49 117 For the duration of the study, the sponsor has subscribed an insurance policy covering the sponsor's  
50  
51 118 own third-party liability as well as the third-party liability of all the investigators involved in the study  
52  
53 119 (EUR 600,000 per participant for bodily injury and property damage combined and EUR 5,000,000 per  
54  
55 120 trial in total. The maximum amount of compensation could vary depending on the country).

### 56 57 121 **Inclusion criteria**

58  
59 122 Patients must fulfil the following criteria prior to trial enrolment:

- 60  
123 1. Adult  $\geq$ 18 years of age at time of enrolment;



- 1  
2  
3 124 2. Has laboratory-confirmed SARS-CoV-2 infection as determined by PCR, or other commercial  
4  
5 125 or public health assay in any specimen < 72 hours prior to randomization;  
6  
7 126 3. Hospitalized patients with illness of any duration, and at least one of the following:  
8  
9 127 – Clinical assessment of pulmonary infection (evidence of rales/crackles on exam) AND SpO<sub>2</sub>  
10 128 ≤ 94% on room air, or  
11  
12 129 – Acute respiratory failure requiring supplemental oxygen, high flow oxygen devices, non-  
13  
14 130 invasive ventilation, and/or mechanical ventilation;  
15  
16 131 4. Women of childbearing potential must agree to use contraception for the duration of the study.

#### 18 132 Non-inclusion criteria

20 133 Patients with any of the following criteria are not eligible for trial enrolment:

- 22 134 1. Refusal to participate expressed by patient or legally authorized representative if they are  
23 135 present;  
24  
25 136 2. Spontaneous blood ALT/AST levels > 5 times the upper limit of normal;  
26  
27 137 3. Stage 4 severe chronic kidney disease or requiring dialysis (i.e. eGFR < 30 mL/min);  
28  
29 138 4. Pregnancy or breast-feeding;  
30  
31 139 5. Anticipated transfer to another hospital, which is not a study site within 72 hours;  
32  
33 140 6. Patients previously treated with one of the antivirals evaluated in the trial (i.e. remdesivir,  
34 141 interferon β-1a, lopinavir/ritonavir, hydroxychloroquine) in the past 29 days;  
35  
36 142 7. Contraindication to any study medication including allergy;  
37  
38 143 8. Use of medications that are contraindicated with lopinavir/ritonavir i.e. drugs whose metabolism  
39 144 is highly dependent on the isoform CYP3A with narrow therapeutic range (e.g. amiodarone,  
40 145 colchicine, simvastatine);  
41  
42 146 9. Use of medications that are contraindicated with hydroxychloroquine: citalopram, escitalopram,  
43 147 hydroxyzine, domperidone, piperazine;  
44  
45 148 10. Human immunodeficiency virus infection under combination antiretroviral therapy;  
46  
47 149 11. History of severe depression or attempted suicide or current suicidal ideation;  
48  
49 150 12. Corrected QT interval superior to 500 milliseconds (as calculated with the Fridericia formula).

#### 54 151 **Randomisation**

56 152 Patients are randomly assigned in a 1:1:1:1:1 ratio into one of the five groups. The randomisation list is  
57  
58 153 computer-generated, with blocks of various sizes and stratified by region (according to the administrative  
59  
60

1  
2  
3 154 definition in each country) and severity of illness at enrolment (severe disease: patients requiring non-  
4  
5 155 invasive ventilation, high flow oxygen devices, invasive mechanical ventilation or ECMO; moderate  
6  
7 156 disease: patients not requiring non-invasive ventilation, high flow oxygen devices, invasive mechanical  
8  
9 157 ventilation nor ECMO). The randomisation list is implemented in the electronic Case Report Form  
10  
11 158 (eCRF) to ensure appropriate allocation concealment.

## 12 159 ***Experimental design***

### 13 160 Study treatments

14 161 The participants are allocated in one of 5 arms (Figure 1).

15 162 Patients included in the remdesivir group receive 200 mg intravenous loading dose on Day 1, followed  
16 163 by a 100 mg once-daily intravenous maintenance dose for the duration of the hospitalization and up to  
17 164 a 10 days' total course. Remdesivir is administered through a 30 to 60 minutes IV infusion.

18 165 Patients included in the lopinavir/ritonavir group receive 400 mg lopinavir and 100 mg ritonavir  
19 166 administered every 12h for 14 days in tablet form. For patients who are unable to take medications by  
20 167 mouth, the lopinavir/ritonavir (400 mg lopinavir/100 mg ritonavir) is administered as a 5-mL suspension  
21 168 every 12h for 14 days via a nasogastric tube.

22 169 Patients included in the lopinavir/ritonavir + interferon  $\beta$ -1a group receive, in addition to  
23 170 lopinavir/ritonavir as described above, interferon  $\beta$ -1a administered subcutaneously at the dose of 44  
24 171  $\mu$ g on Day 1, Day 3, and Day 6 (total of 3 doses). No dosage adjustment is provided for renal or hepatic  
25 172 impairment for IFN- $\beta$ -1a.

26 173 Patients included in the hydroxychloroquine group receive a loading dose of 400 mg twice daily for one  
27 174 day followed by 400 mg once daily for 9 days. The rationale for this loading dose has been published.[6]

28 175 Patients included in the control group receive the standard of care of their recruitment center.  
29 176 Investigational drugs were kindly provided by pharmaceutical firms.

### 30 177 Rationale for study treatments

31 178 Remdesivir (GS-5734) is a broad-spectrum nucleotide prodrug inhibiting RNA-dependent polymerase  
32 179 activity among a diverse group of RNA viruses including filoviruses (e.g. Ebola, Sudan, Marburg),  
33 180 paramyxoviruses (e.g. RSV, Nipah, Hendra) and pathogenic coronaviruses.[7–9] Studies in human  
34 181 airway epithelial cell assays demonstrated that remdesivir inhibits replication of coronaviruses, including  
35 182 MERS-CoV.[10] Remdesivir has shown an *in vitro* activity on SARS-CoV-2[11] and a clinical benefit in  
36 183 rhesus macaques infected with SARS-CoV-2.[12] A large RCT has shown that remdesivir shortened  
37  
38  
39  
40  
41  
42  
43  
44  
45  
46  
47  
48  
49  
50  
51  
52  
53  
54  
55  
56  
57  
58  
59  
60

184 the time to recovery in adults hospitalized with Covid-19 as compared to placebo but the results were  
185 not significant for mortality.[13]

186 Lopinavir/ritonavir is a fixed-dose combination used in HIV infection that has shown an *in vitro* activity  
187 against SARS-CoV in several studies.[14] A structure-based study suggested that the spatial structure  
188 of the lopinavir/ritonavir binding site was conserved between SARS-CoV and SARS-CoV-2.[15] The  
189 results of an open RCT evaluating lopinavir/ritonavir for COVID-19 were published on March 18,  
190 2020.[16] In this trial, adults with confirmed COVID-19 and hypoxemia ( $SpO_2 < 94\%$ ) were randomized  
191 to lopinavir/ritonavir (n=99) or standard of care (n=100). No significant difference between the 2 groups  
192 was observed on the time to clinical improvement on a 7-item ordinal scale. (HR of improvement 1.31;  
193 CI95% 0.95 - 1.80) but a trend to lower mortality rate was observed (19.0% vs. 27.1%) in the 90 patients  
194 (45.2% of the total) receiving lopinavir/ritonavir less than 12 days after the beginning of the symptoms.

195 Interferon (IFN)- $\beta$ -1 is a broad-spectrum antiviral drug belonging to the type 1 interferons. Type 1 IFN  
196 treatment has shown an activity against MERS-CoV and SARS-CoV in numerous experiments, both *in*  
197 *vitro* and *in vivo*.[17–19] Type 1 interferon is currently being tested for MERS-CoV in the MIRACLE  
198 clinical trial.[20] SARS-CoV-2 displays *in vitro* a substantial susceptibility to IFN- $\alpha$  [21] and data  
199 regarding the potential activity of type 1 interferons on SARS-CoV-2 has been reviewed recently.[22] A  
200 RCT found that COVID-19 patients treated with a triple combination interferon beta-1b, lopinavir-  
201 ritonavir, and ribavirin had a significantly shorter median time from start of study treatment to negative  
202 nasopharyngeal swab (7 days [IQR 5-11]) than the control group up (12 days [8-15]; hazard ratio 4.37  
203 [95% CI 1.86-10.24],  $p=0.0010$ ).[23]

204 The *in vitro* antiviral activity of hydroxychloroquine has been known for a long time [24] and was  
205 described on a number of viruses including SARS-CoV.[25,26] Regarding COVID-19, recent  
206 publications reported an *in vitro* activity of hydroxychloroquine on SARS-CoV-2 [11][27] and non-  
207 randomized observational studies provided conflicting clinical results.[28,29] A RCT on postexposure  
208 prophylaxis for COVID-19 found that hydroxychloroquine did not prevent illness compatible with Covid-  
209 19 or confirmed infection.[30]

### 210 **Participant timeline**

211 Clinical evaluations for efficacy and safety are performed at baseline, daily while the patient is  
212 hospitalized and at 15 (+/- 2 d) and 29 (+/- 3 d) (Table 1, Figure 2).

1  
2  
3 213 Upper (nasopharyngeal swab) and/or lower (endotracheal aspiration) respiratory tract and blood  
4  
5 214 samples for centralized analysis of the SARS-CoV-2 kinetics are collected at baseline and at days 3 (+/  
6  
7 215 1 d), 5 (+/- 1 d), 8 (+/- 1 d), 11 (+/- 1 d), 15 (+/- 2 d) and 29 (+/- 3 d). RT-PCR methods for SARS-COV-2  
8  
9 216 detection in participating centers are different but their performances were all validated by French  
10  
11 217 National Reference Center for Viral Respiratory Infections and viral loads are determined using the  
12  
13 218 specific French National Reference Center RT-PCR IP4.[31] For each sample, the viral load is  
14  
15 219 measured by a specific SARS-COV-2 real-time (RT)-PCR and normalized according the number of cells  
16  
17 220 in each sample. This method is validated to monitor viral load kinetics over time and expressed in  
18  
19 221 standardized unit log of number of viral copies/10 000 cells.

20 222 Blood samples for pharmacokinetic analysis are collected:

- 21 223 – For remdesivir, to measure plasma and intracellular concentrations at days 1, 2, 5, 8 and 11;
- 22 224 – For lopinavir, to measure plasma concentrations at days 1, 3 (+/- 1 d), 6 (+/- 1 d), 8 (+/- 1 d) and  
23 225 11 (+/- 1 d);
- 24 226 – For IFN  $\beta$ -1-a, to measure plasma concentrations at days 3 and 6;
- 25 227 – For hydroxychloroquine, to measure plasma concentrations at days 1, 3 (+/- 1 d), 5 (+/- 1 d), 8  
26 228 (+/- 1 d) and 11 (+/- 1 d).

27  
28  
29  
30  
31  
32  
33 229 Thoracic imaging by X-ray or CT scan are performed at baseline, and at days 8 (+/- 1 d), 15 (+/- 2 d)  
34  
35 230 and 29 (+/- 3 d).

36  
37 231 Biological evaluations for safety are performed at baseline and at days 3 (+/- 1 d), 5 (+/- 1 d), 8 (+/- 1  
38  
39 232 d), 11 (+/- 1 d), 15 (+/- 2 d) and 29 (+/- 3 d).

40  
41 233 A sample collection is constituted for each patient (biobank) including whole blood and plasma at  
42  
43 234 baseline and plasma at days 3 (+/- 1 d), 5 (+/- 1 d), 8 (+/- 1 d), 11 (+/- 1 d), 15 (+/- 2 d) and 29 (+/- 3 d).

44  
45 235 The biobank will be used to conduct ancillary analyses that remain to be determined.

#### 46 47 236 **Primary endpoint**

48  
49 237 The primary endpoint is the clinical status at Day 15 on the 7-point ordinal scale of the WHO Master  
50  
51 238 Protocol (version 3.0, March 3, 2020):

- 52 239 1. Not hospitalized, no limitation on activities;
  - 53 240 2. Not hospitalized, limitation on activities;
  - 54 241 3. Hospitalized, not requiring supplemental oxygen;
  - 55 242 4. Hospitalized, requiring supplemental oxygen;
- 56  
57  
58  
59  
60

- 1  
2  
3 243 5. Hospitalized, on non-invasive ventilation or high flow oxygen devices;  
4  
5 244 6. Hospitalized, on invasive mechanical ventilation or ECMO;  
6  
7 245 7. Death.

8  
9 246 For the scores 1 and 2, limitation of the activities refers to the pre-COVID-19 clinical status, in order to  
10  
11 247 take into account potential pre-existing limitations.

12  
13 248 **Secondary endpoints**

14  
15 249 Secondary endpoints are classified as efficacy or safety endpoints.

16  
17 250 Efficacy secondary endpoints

18  
19 251 1. 7-point ordinal scale

- 20 252 - Time to an improvement of one category from admission on the ordinal scale.  
21  
22 253 - Subject clinical status on the ordinal scale on Days 3, 5, 8, 11, and 29.  
23  
24 254 - Mean change in the ranking on the ordinal scale from baseline to Days 3, 5, 8, 11, 15  
25  
26 255 and 29 from baseline.

27  
28 256 2. National Early Warning Score (NEWS)

- 29  
30 257 - The time to discharge or to a NEWS of  $\leq 2$  and maintained for 24 hours, whichever  
31  
32 258 occurs first.  
33  
34 259 - Change from baseline to Days 3, 5, 8, 11, 15, and 29 in NEWS.

35  
36 260 3. Oxygenation

- 37 261 - Oxygenation free days in the first 28 days (to Day 29).  
38  
39 262 - Incidence and duration of new oxygen use, non-invasive ventilation or high flow oxygen  
40  
41 263 devices during the study.

42  
43 264 4. Mechanical ventilation

- 44  
45 265 - Ventilator free days in the first 28 days (to Day 29).  
46  
47 266 - Incidence and duration of new mechanical ventilation use during the study.

48  
49 267 5. Hospitalization

- 50  
51 268 - Duration of hospitalization (days).

52  
53 269 6. Mortality

- 54  
55 270 - In-hospital mortality  
56  
57 271 - 28-day mortality.  
58  
59 272 - 90-day mortality  
60

1  
2  
3 273 Safety secondary endpoints  
4

- 5 274 1. Cumulative incidence of any grade 3 and 4 adverse events;  
6  
7 275 2. Cumulative incidence of any serious adverse event;  
8  
9 276 3. Proportion of patients with a premature discontinuation or temporary suspension of the study  
10 drug, for any reason;  
11 277  
12 278 4. Grade changes in biological parameters, as measured using the Division of AIDS Table for  
13 Grading the Severity of Adult and Pediatric Adverse Events (white cell count, haemoglobin,  
14 279 platelets, creatinine, blood electrolytes (including kaliemia), prothrombin time and international  
15 280 normalized ratio (INR), glucose, total bilirubin, ALT, and AST) over time.  
16 281

17  
18  
19  
20 282 Exploratory endpoints  
21

- 22 283 1. Qualitative and quantitative PCR for SARS-CoV-2 normalized according to the number of  
23 sample cells in nasopharyngeal or lower respiratory tract samples on days 1, 3, 5, 8, 11, 15  
24 284 and 29;  
25 285  
26 286 2. Qualitative and quantitative PCR for SARS-CoV-2 in blood on days 1, 3, 5, 8 and 11;  
27  
28 287 3. Development of resistance of SARS-CoV-2 in nasopharyngeal or lower respiratory tract  
29 samples at days 3, 5, 8, 11, 15 and 29;  
30 288  
31 289 4. Whole genome sequencing of participants to identify genetic variants associated with (i) the  
32 development of severe clinical disease (ii) the response in terms of safety and efficacy to  
33 investigational antiviral drugs;  
34 290  
35 291 5. Imagery assessment through chest X-ray or thoracic CT scan on days 1, 8, 15 and 29,  
36 depending on availability in centre;  
37 292  
38 293 6. Study drugs concentrations, sampled while the participant is hospitalized:  
39  
40 294  
41 295 - For remdesivir, as assessed by plasma concentration after the end of infusion on day 1,  
42 trough plasma and intracellular concentrations before the 2<sup>nd</sup> dose administration on day  
43 296 2, and trough plasma concentration on days 5 and 8;  
44 297  
45 298 - For lopinavir, peak plasma concentration measured 4 hours after the 1st administration  
46 and trough plasma concentrations measured just before the 2nd administration and on  
47 299 days 3, 6, 8 and 11;  
48 300  
49 301 - For IFN  $\beta$ -1-a, trough plasma concentration on days 3 and 6;  
50  
51 302 - For hydroxychloroquine, peak plasma concentration measured 4 hours after the 1<sup>st</sup>  
52  
53  
54  
55  
56  
57  
58  
59  
60

1  
2  
3 303 administration and trough plasma concentrations measured just before the 2<sup>nd</sup>  
4  
5 304 administration and on days 3, 5, 8 and 11.

6  
7 305 ***Data collection***

8  
9 306 The trial is conducted in accordance with relevant regulations and standard operating procedures,  
10  
11 307 including data protection. The data are collected on an electronic case report form. Clinical site  
12  
13 308 monitoring is conducted to ensure that the rights are protected and confirm the integrity of collected  
14  
15 309 data. The persons responsible for the quality control of the data take all necessary precautions to ensure  
16  
17 310 the confidentiality of information regarding investigational medicinal products, the trial, trial participants  
18  
19 311 and in particular the identity of the participants and the results obtained.

20 312 ***Safety and adverse events monitoring***

21  
22 313 All adverse events are collected regardless of their grade of severity. The choice of continuing therapy  
23  
24 314 is at the discretion of the investigator. All adverse events are classified in grades from mild (grade 1) to  
25  
26 315 life threatening (grade 4) following the DAIDS Table for Grading the Severity of Adult and Pediatric  
27  
28 316 Adverse Events (version 2.1 of July 2017) of the National Institute of Health and National Institute of  
29  
30 317 Allergy and Infectious Diseases of the US Department of Health and Human Services.

31  
32 318 ***Statistical considerations***

33  
34 319 *General considerations*

35  
36 320 Continuous variables will be summarized by the mean, standard deviation, median, interquartile range,  
37  
38 321 minimum and maximum. The change from baseline will be compared using Student's t-test or a  
39  
40 322 Wilcoxon-Mann-Whitney test if the normality assumption does not hold.

41  
42 323 Categorical data will be summarized with the number and proportion of patients. Data will be compared  
43  
44 324 using odds ratios and a Fisher's exact test.

45  
46 325 All statistical tests will be 2-sided with type I error of 0.05. As there are 4 comparisons, each treatment  
47  
48 326 group will be compared to the control group with a two-sided type I error of 0.0125. Subgroup analyses  
49  
50 327 for the primary and secondary endpoints will evaluate the treatment effect across the following  
51  
52 328 subgroups: disease severity at inclusion, geographic region, duration of symptoms prior to enrolment,  
53  
54 329 age and sex. A forest plot will display confidence intervals across subgroups. Interaction tests will be  
55  
56 330 conducted to determine whether the effect of treatment varies by subgroup.

57 331 *Sample size computation*



1  
2  
3 332 A sample size of 3,100 patients (620 patients per arm) is targeted. The sample size was determined  
4  
5 333 assuming the following scenario under standard of care for each item of the ordinal scale: 1: 42%, 2:  
6  
7 334 38%, 3: 8%, 4: 7%, 5: 2%, 6: 1%, 7: 2%.

8  
9 335 There is significant uncertainty with these assumptions given the limited data available. Since a large  
10  
11 336 proportion of patients are moderately ill patients, we power the study for an odds ratio of 1.5 (an odds  
12  
13 337 ratio higher than 1 indicates superiority of the experimental treatment over the control for each ordinal  
14  
15 338 scale category), with 90% power and using an overall one-sided type I error rate of 0.05.[32] Adjusting  
16  
17 339 for multiplicity of 4 pairwise comparisons with the control arm in a 5-arm setting, the (one-sided) false  
18  
19 340 positive error rate would be 0.00625, (which requires achieving two-sided  $p=0.0125$ .) The samples size  
20  
21 341 might evolve whenever any treatment arm is withdrawn or added to the trial.

#### 22 342 Definition of analysis sets

23  
24 343 The intention-to-treat population is defined as all randomised patients, where patients are analysed in  
25  
26 344 their randomisation group whether they have or not followed the allocated treatment. The modified  
27  
28 345 intention-to-treat population is defined as all randomised patients who did receive at least one dose of  
29  
30 346 the allocated treatment.

31  
32 347 The primary and efficacy secondary analysis will be conducted on the intention-to-treat population.  
33  
34 348 Safety analyses will be based on the modified intention-to-treat population.

#### 35 349 Adaptive design

36  
37 350 This study is intended to allow for adaptations with the ability to add a new experimental arm if one  
38  
39 351 becomes available. The current plan is to evaluate the primary endpoint on day 15. If additional data  
40  
41 352 become available to add an experimental therapy, analyses of experimental arms will be performed  
42  
43 353 comparing concurrently enrolled control subjects. If one treatment crosses an efficacy stopping  
44  
45 354 boundary, this treatment may become the new control arm for comparisons. This approach was used in  
46  
47 355 the recent PALM Ebola therapy randomized clinical trial.[33]

#### 48 49 356 Interim analyses

50  
51 357 Interim analyses will be by the independent statistician of the DSMB. There are no formal stopping rules  
52  
53 358 for efficacy or safety. The DSMB will make recommendations taking into consideration the totality of the  
54  
55 359 evidence from the efficacy and safety outcomes as they accumulate, as well as external evidence.

56  
57 360 For efficacy, the statistical analysis will be done on the primary endpoint, the 7-point ordinal scale at 15  
58  
59 361 days, and be based on the Haybittle Peto rule.[34,35] That is, if any active treatment is superior to  
60



1  
2  
3 362 control at  $P < .001$  then consideration will be given to stopping early for efficacy. This would have major  
4  
5 363 implications; hence the stopping boundary is stringent in the spirit of requiring proof beyond reasonable  
6  
7 364 doubt.

8  
9 365 For futility, i.e. stopping because an active treatment appears ineffective, the statistical analysis will be  
10  
11 366 done with the primary endpoint. Comparing an active treatment with control, if the upper 95% confidence  
12  
13 367 limit for the common odds ratio is less than 1.25 then consideration be given to stopping that treatment  
14  
15 368 for futility. All the above is intended for all randomised patients. Analyses will be stratified by baseline  
16  
17 369 severity of disease. For safety, no pre-specify stopping guideline will be defined because there are  
18  
19 370 various aspects of potential harm that could be studied. However, to allow for some caution, any safety  
20  
21 371 signal on SAE, i.e. active treatment worse than control, requires  $P < .01$  to merit consideration of stopping  
22  
23 372 that treatment arm.

#### 24 373 Final analysis of the primary endpoint

25  
26 374 The primary outcome uses a 7-point ordinal scale analysed using a proportional odds model. This model  
27  
28 375 assumes that the treatment to control odds ratio of being classified in a given severity category “i” or  
29  
30 376 better is the same for each category. The null hypothesis being tested is whether the odds of  
31  
32 377 improvement on the ordinal scale is the same for the control and experimental treatment arms (i.e.,  
33  
34 378 whether the common odds ratio differs is 1). Odds ratios are then interpreted as the odds of being “lower”  
35  
36 379 or “higher” on the ordinal scale across the entire range of the scale. The hypothesis test is, for large  
37  
38 380 sample sizes, nearly the same as the Wilcoxon rank sum test. Therefore, the procedure produces a  
39  
40 381 valid p-value regardless of whether the proportional odds model is correct. Nonetheless, estimation and  
41  
42 382 confidence intervals do require the model to be correct. Accordingly, we will evaluate model fit using a  
43  
44 383 goodness-of-fit likelihood ratio test. The validity of the proportionality assumption will be evaluated and  
45  
46 384 tested. To deal with potential missing data, the last observation will be carried forward until the next  
47  
48 385 available value.

#### 49 386 Analysis of secondary endpoints

50  
51 387 Differences in time-to-event endpoints by treatment will be summarized with Kaplan-Meier curves and  
52  
53 388 95% confidence interval; and cumulative incidence plots, for time-to-event endpoints with competing  
54  
55 389 risk (e.g. death). Duration of event will be summarized according to median days with quartiles.  
56  
57 390 Incidence data will be summarized as percent with 95% confidence interval. Time-to-event endpoints  
58  
59  
60

1  
2  
3 391 will be compared using the log-rank test. For time-to-event endpoints with a competing risk Fine and  
4  
5 392 Gray models will be used. All tests will be stratified by the baseline severity.

### 6 7 393 **Committees for the research**

8  
9 394 The DisCoVeRy French Trial Management Team (TMT) has developed and implemented the protocol  
10  
11 395 in France (Supplementary file). A DisCoVeRy European Steering Committee (DSC) has been  
12  
13 396 constituted to serve as the governance organ for the trial. It provides the overall supervision of the trial,  
14  
15 397 including for the relations with European stakeholders, the Steering Committee and the Executive  
16  
17 398 Committee of the Solidarity trial (see below). It ensures that the trial is conducted in accordance with  
18  
19 399 ethical principles and respects participants' safety, take any decision on any changes made to the design  
20  
21 400 of the DisCoVeRy trial, and on the reporting of the trial results, including regarding the publication policy.  
22  
23 401 An international independent DSMB has been constituted to preserve the interests of trial participants,  
24  
25 402 to monitor the main outcome measures (including safety and efficacy), and to monitor the overall  
26  
27 403 conduct of the trial. Based on interim analyses of the data, it will make recommendations about early  
28  
29 404 study closure or changes to the trial, including adding or removing treatment arms. The DSMB will meet  
30  
31 405 after 100 participants are included into the study, and then every 200 new patients are included, with a  
32  
33 406 maximum of 1 DSMB meeting per week. Other ad hoc reviews will be undertaken if there are specific  
34  
35 407 safety concerns. The study will not stop enrolment awaiting these DSMB reviews, though the DSMB  
36  
37 408 may recommend temporary or permanent cessation of enrolment based on their safety reviews.

### 37 38 409 **Intertwinement with WHO Solidarity program**

39  
40 410 Since April 5, 2020, DisCoVeRy has been an add-on trial of the Solidarity program conducted by the  
41  
42 411 WHO in Europe and worldwide. The same treatments are evaluated in DisCoVeRy and in Solidarity.  
43  
44 412 Solidarity has 3 endpoints which are also secondary endpoints of DisCoVeRy: (i) mortality during  
45  
46 413 hospitalization (the primary endpoint of Solidarity) (ii) length of hospital stay and (iii) time to mechanical  
47  
48 414 ventilation or transfer to intensive care. At each DisCoVeRy DSMB meeting, the recommendations will  
49  
50 415 be transmitted to the Data and Safety Monitoring Committee (DSMC) of Solidarity. The Executive  
51  
52 416 Committee of Solidarity will ultimately issue recommendations on the different treatments evaluated,  
53  
54 417 allowing a unique communication on each of the treatments evaluated.

### 54 55 418 **Patient and public involvement**

56  
57 419 No patients were involved in the design or implementation of this study.

58  
59 420  
60

## 421 **ETHICS AND DISSEMINATION**

### 422 **Ethics approval**

423 Inserm is the sponsor of DisCoVeRy in Europe. Ethical approval was first obtained in France from the  
424 institutional review board on March 13, 2020 (Comité de Protection des Personnes Ile de France 3,  
425 approval number 20.03.06.51744), and the trial received approval by the French National Agency for  
426 Medicines and Health Products (ANSM) on March 9, 2020. The protocol described in this article is the  
427 version 7.0 of the DisCoVeRy protocol approved on April 5, 2020. Any substantial amendment made to  
428 the protocol by the coordinating investigator is sent to local ethics committee and health authorities in  
429 each country for approval, prior to implementation. The sponsor shall have the right to audit any center  
430 participating in the study and may appoint an auditor to carry out such an audit. Such right to audit shall  
431 include access all relevant documents and other information relating to the clinical trial. If the sponsor  
432 decides to audit the trial, only one audit will be performed

### 433 **Informed consent**

434 Prior to any act carried out as part of the research, subjects receive a concise and focused presentation  
435 of key information about the clinical trial, verbally and with a written consent form. An emergency consent  
436 procedure with the legal guardian or relatives of the patient has been put in place for patients who are  
437 unable to consent. The informed consent form of the study contains information's about possible data  
438 sharing and biological specimens sharing for ancillary studies. Participants are also provided with a link  
439 to a website where they can find all information about data sharing. The forms have been reviewed by  
440 the Ethics committee that authorized the trial.

### 441 **Dissemination**

442 Results will be communicated at scientific meetings and submitted for publication in peer-reviewed  
443 journals. According to the information sheet, participants will be informed of the overall results at the  
444 end of the trial. In addition, participants are informed of the discontinuation of a treatment arm in the trial  
445 after validation by the ethics committee.

446

## 447 **DISCUSSION**

### 448 ***Strengths and limitations of the DisCoVeRy trial design***

449 The DisCoVeRy clinical trial is a randomized, open clinical trial that aims to evaluate the safety and  
450 efficacy of possible therapeutic agents in hospitalized adult patients diagnosed with COVID-19. The

1  
2  
3 451 design of DisCoVeRy is adaptive meaning that it can adapt to the ongoing production of evidence and  
4  
5 452 to interim analyses by discontinuing arms that are proved inferior to others, selecting an existing arm as  
6  
7 453 the standard of care if proved superior to others and adding arms if new candidate therapeutic strategies  
8  
9 454 emerge.

10 455 As detailed above, DisCoVeRy is an add-on trial of the Solidarity trial, conducted under the aegis of the  
11  
12 456 WHO in Europe and worldwide. Sharing the data from DisCoVeRy relevant to the Solidarity trial  
13  
14 457 (inclusion data and data related to the Solidarity endpoints) increases the number of participants for  
15  
16 458 whom this data is available and thus leads to a faster conclusion on the effectiveness, deleterious effect  
17  
18 459 or ineffectiveness of the treatments evaluated. Inclusion in a same strategy of hospitalized patients with  
19  
20 460 severe (patients requiring non-invasive ventilation, high flow oxygen devices, invasive mechanical  
21  
22 461 ventilation or ECMO) or moderate disease will allow to evaluate the different drug candidates in different  
23  
24 462 clinical situations. Moreover, by including patients at different times in their clinical history of COVID-19,  
25  
26 463 we will be able to study when is the best time to start an antiviral agent in relation to the delay of  
27  
28 464 symptoms. The collection of samples for pharmacological monitoring, viral kinetics and medical imaging  
29  
30 465 will provide crucial data to analyze the PK/PD of evaluated drugs and the effect of treatment on the  
31  
32 466 virological and radiological evolution. A biobank has also been planned to conduct further analyses that  
33  
34 467 still remain to be determined. However, DisCoVeRy will not provide data on treatments for COVID-19  
35  
36 468 at an early phase, before there is a need for hospitalization. As only antiviral agents are evaluated in  
37  
38 469 DisCoVeRy, we will not be able to evaluate the efficacy of immunomodulatory agents, including  
39  
40 470 corticosteroids.

41 471

#### 42 43 472 ***Strengths and limitations of real-time interventional research in the setting of a pandemic***

44  
45 473 Discovery is not a placebo-controlled trial and is not double-blind because of the complexity of blinding  
46  
47 474 treatments with different mode of administration (intravenous, sub-cutaneous or oral) and the need to  
48  
49 475 initiate the trial very rapidly. Moreover, in a recent meta-epidemiological study, no evidence was found  
50  
51 476 that lack of blinding of patients, healthcare providers, or outcome assessors had an impact on effect  
52  
53 477 estimates in randomised clinical trials.[36]

54  
55 478 Integrating clinical trials of experimental therapeutics is an increasingly recognized part of the response  
56  
57 479 during infectious disease outbreaks. Since the Ebola outbreak in West Africa and subsequent outbreaks  
58  
59 480 in the Democratic Republic of Congo, clinical trials of investigative drugs have been fully integrated in  
60

1  
2  
3 481 the epidemic response.[37–39] Implementing large clinical trial is both direly needed and particularly  
4  
5 482 challenging during a pandemic. Indeed, the pandemic context compels us to organize clinical trials  
6  
7 483 urgently while keeping methodological requirements of the highest level which is the only way to provide  
8  
9 484 reliable answers for clinicians. The selection of the best candidate drugs for a new outbreak is a major  
10  
11 485 challenge and a strength of the DisCoVeRy trial is that its adaptive design allows to add new arms if  
12  
13 486 good evidence emerges while the trial is continuing that some other treatment(s) should also be  
14  
15 487 evaluated. There have been controversies regarding the candidate treatments that should be selected  
16  
17 488 for COVID-19 clinical trials and notably regarding hydroxychloroquine. Hydroxychloroquine was  
18  
19 489 identified at the beginning of the pandemic as a candidate treatment based on preliminary data and  
20  
21 490 quickly became the most tested treatment in the world for COVID-19.[40,41] However, many of the  
22  
23 491 articles supporting hydroxychloroquine suffered from methodological shortcomings and were in fact non-  
24  
25 492 informative.[42] Hydroxychloroquine has been widely promoted as soon as February 2020 as an  
26  
27 493 effective drug by some scientists and politics[43], leading to difficulties in recruiting patients in  
28  
29 494 randomized clinical trials such as DisCoVeRy.[44] This is why the ever-changing scientific background  
30  
31 495 supporting the use of each candidate treatment should be clear, detailed and regularly updated and  
32  
33 496 pragmatic, adaptive clinical trials should be encouraged. Transparency, consistency and quality of  
34  
35 497 design are more crucial than ever during pandemics to provide relevant and reliable data.

36 498

#### 37 499 **TRIAL STATUS**

39 500 This trial has begun on March 22, 2020. On July 28, 2020, 801 patients have been included.

41 501

#### 43 502 **DATA SHARING PLAN**

45 503 Study protocol and statistical analysis plan will be openly available. Systematic individual patient data  
46  
47 504 sharing is not intended, but all requests for the trial's data will be considered by the French DisCoVeRy  
48  
49 505 Trial Management Team.

51 506

507 **Figure 1.** DisCoVeRy trial arms, drugs and dosing schedule

508 **Figure 2.** Schematic representation of the experimental design of the DisCoVeRy clinical trial.

509 **Table 1.** Schedule of enrolment, interventions and assessment in the DisCoVeRy trial

| Day +/- Window                                                                       | Screening | Baseline <sup>1</sup> | D1 | D2-D14 <sup>2</sup>                                                                                                  | D15 <sup>2</sup><br>± 2 | D29 <sup>2</sup><br>± 3 | D90 |
|--------------------------------------------------------------------------------------|-----------|-----------------------|----|----------------------------------------------------------------------------------------------------------------------|-------------------------|-------------------------|-----|
| <b>ELIGIBILITY</b>                                                                   |           |                       |    |                                                                                                                      |                         |                         |     |
| Informed consent                                                                     | X         |                       |    |                                                                                                                      |                         |                         |     |
| Demographics & Medical History                                                       | X         |                       |    |                                                                                                                      |                         |                         |     |
| EKG                                                                                  | X         |                       |    |                                                                                                                      |                         |                         |     |
| Review SARS-CoV-2 PCR results                                                        | X         |                       |    |                                                                                                                      |                         |                         |     |
| <b>STUDY INTERVENTION</b>                                                            |           |                       |    |                                                                                                                      |                         |                         |     |
| Randomization                                                                        |           | X                     |    |                                                                                                                      |                         |                         |     |
| Standard of Care (SoC)                                                               |           |                       |    |                                                                                                                      |                         |                         |     |
| Or SoC plus administration of Lopinavir/ritonavir                                    |           |                       |    | Lopinavir/ritonavir for 14 days                                                                                      |                         |                         |     |
| Or SoC plus administration of Lopinavir/ritonavir in association with Interferon β1a |           |                       |    | Lopinavir/ritonavir for 14 days<br>Interferon β-1a day 1, day 3<br>day 6 or until discharge (after at least 2 doses) |                         |                         |     |
| Or SoC plus administration of remdesivir                                             |           |                       |    | Daily administration until discharge (after at least 5 days) or day 10                                               |                         |                         |     |
| Or SoC plus administration of hydroxychloroquine                                     |           |                       |    | Daily administration until day 10                                                                                    |                         |                         |     |
| <b>STUDY PROCEDURES</b>                                                              |           |                       |    |                                                                                                                      |                         |                         |     |
| Vital signs including SpO <sub>2</sub>                                               |           | X                     | X  | Daily until discharge                                                                                                | X                       | X                       |     |
| Clinical data collection                                                             |           | X                     | X  | Daily until discharge                                                                                                | X                       | X                       | X   |

|    |                                                                        |                |  |                |                                   |   |   |   |
|----|------------------------------------------------------------------------|----------------|--|----------------|-----------------------------------|---|---|---|
| 3  | Electrocardiogram (EKG) <sup>3</sup>                                   | X              |  |                | Days 3, 5, 8                      |   |   |   |
| 5  | Medication review                                                      | X              |  | X              | Daily until discharge             | X | X |   |
| 7  | Adverse event evaluation                                               |                |  | X              | Daily until discharge             | X | X | X |
| 10 | <b>SAFETY LABORATORY</b>                                               |                |  |                |                                   |   |   |   |
| 13 | Safety haematology, chemistry and<br>liver tests                       | X <sup>4</sup> |  | X <sup>5</sup> | Days 3, 5, 8, 11 (all ±<br>1 day) | X | X |   |
| 17 | Pregnancy test for females of<br>childbearing potential                | X <sup>4</sup> |  |                |                                   | X | X |   |
| 21 | Plasma concentration of lopinavir                                      |                |  | X              | Days 3, 6, 8, 11 (all ± 1<br>day) |   |   |   |
| 24 | Plasma concentration of<br>hydroxychloroquine                          |                |  | X              | Days 3, 5, 8, 11(all ± 1<br>day)  |   |   |   |
| 28 | Plasma and intracellular<br>concentration of remdesivir                |                |  | X              | Days 2, 5, 8 if<br>hospitalized   |   |   |   |
| 32 | Plasma concentration of interferon β-<br>1a                            |                |  |                | Days 3, 6 if<br>hospitalized      |   |   |   |
| 38 | <b>RESEARCH LABORATORY</b>                                             |                |  |                |                                   |   |   |   |
| 41 | Biobank (whole blood and plasma) <sup>6</sup>                          |                |  | X <sup>6</sup> | Days 3, 5, 8, 11 (all ±<br>1 day) | X | X |   |
| 45 | Plasma for PCR SARS-CoV-2 <sup>7</sup>                                 |                |  | X              | Day 3, 5, 8, 11 (all ± 1<br>day)  |   |   |   |
| 48 | Nasopharyngeal swab or lower<br>respiratory tract samples <sup>7</sup> |                |  | X              | Day 3, 5, 8, 11 (all ± 1<br>day)  | X | X |   |
| 52 | Thoracic CT scan or chest x-ray                                        |                |  | X              | Day 8 (± 1 day)                   | X | X |   |
| 54 | Whole blood for genetic analysis                                       |                |  | X              |                                   |   |   |   |

510 1. Baseline assessments should be performed prior to study drug administration.

511 2. If discharged from the hospital, visits and safety assessments are conducted in the outpatient

512 setting.

- 1  
2  
3 513 3. *An electrocardiogram (EKG) with calculation of the corrected QT (Fridericia formula) is reviewed*  
4  
5 514 *at screening and monitored at Day 3, 5, 8 in patients treated with hydroxychloroquine.*  
6  
7 515 4. *Laboratory tests performed in the 48 hours prior to enrolment are accepted for determination of*  
8  
9 516 *eligibility.*  
10  
11 517 5. *Any laboratory tests performed in the 24 hours before randomization can be used for baseline and*  
12  
13 518 *Day 1.*  
14  
15 519 6. *For the biobank, whole blood is only collected at baseline.*  
16  
17 520 7. For each sample, the viral load is measured by a specific SARS-COV-2 real-time (RT)-PCR and  
18  
19 521 normalized according the number of cells in each sample. This method is validated to monitor viral  
20  
21 522 load kinetics over time and expressed in standardized unit log of number of viral copies/10 000 cells.  
22  
23 523



524

525 **AUTHOR CONTRIBUTION :**526 **Conceptualization, investigation, supervision, writing - original draft: FA**

527

528 **REFERENCES**

529

- 530 1 Drosten C, Günther S, Preiser W, *et al.* Identification of a novel coronavirus in patients with  
 531 severe acute respiratory syndrome. *N Engl J Med* 2003;**348**:1967–76. doi:10.1056/NEJMoa030747
- 532 2 Ksiazek TG, Erdman D, Goldsmith CS, *et al.* A novel coronavirus associated with severe  
 533 acute respiratory syndrome. *N Engl J Med* 2003;**348**:1953–66. doi:10.1056/NEJMoa030781
- 534 3 Zaki AM, van Boheemen S, Bestebroer TM, *et al.* Isolation of a novel coronavirus from a man  
 535 with pneumonia in Saudi Arabia. *N Engl J Med* 2012;**367**:1814–20. doi:10.1056/NEJMoa1211721
- 536 4 World Health Organization. WHO characterizes COVID-19 as a pandemic.  
 537 2020.https://www.who.int/emergencies/diseases/novel-coronavirus-2019/events-as-they-happen  
 538 (accessed 14 Mar 2020).
- 539 5 World Health Organization. WHO R&D Blueprint novel Coronavirus COVID-19 Therapeutic  
 540 Trial Synopsis. 2020.https://www.who.int/blueprint/priority-diseases/key-action/COVID-  
 541 19\_Treatment\_Trial\_Design\_Master\_Protocol\_synopsis\_Final\_18022020.pdf (accessed 10 Mar  
 542 2020).
- 543 6 Lê MP, Peiffer-Smadja N, Guedj J, *et al.* Rationale of a loading dose initiation for  
 544 hydroxychloroquine treatment in COVID-19 infection in the DisCoVeRy trial. *J Antimicrob Chemother*  
 545 Published Online First: 30 May 2020. doi:10.1093/jac/dkaa191
- 546 7 Lo MK, Jordan R, Arvey A, *et al.* GS-5734 and its parent nucleoside analog inhibit Filo-,  
 547 Pneumo-, and Paramyxoviruses. *Sci Rep* 2017;**7**:43395. doi:10.1038/srep43395
- 548 8 Lo MK, Feldmann F, Gary JM, *et al.* Remdesivir (GS-5734) protects African green monkeys  
 549 from Nipah virus challenge. *Sci Transl Med* 2019;**11**. doi:10.1126/scitranslmed.aau9242
- 550 9 Warren TK, Jordan R, Lo MK, *et al.* Therapeutic efficacy of the small molecule GS-5734  
 551 against Ebola virus in rhesus monkeys. *Nature* 2016;**531**:381–5. doi:10.1038/nature17180
- 552 10 Sheahan TP, Sims AC, Graham RL, *et al.* Broad-spectrum antiviral GS-5734 inhibits both  
 553 epidemic and zoonotic coronaviruses. *Sci Transl Med* 2017;**9**. doi:10.1126/scitranslmed.aal3653
- 554 11 Wang M, Cao R, Zhang L, *et al.* Remdesivir and chloroquine effectively inhibit the recently  
 555 emerged novel coronavirus (2019-nCoV) in vitro. *Cell Res* 2020;**30**:269–71. doi:10.1038/s41422-020-  
 556 0282-0
- 557 12 Williamson BN, Feldmann F, Schwarz B, *et al.* Clinical benefit of remdesivir in rhesus  
 558 macaques infected with SARS-CoV-2. *bioRxiv* 2020;:2020.04.15.043166.  
 559 doi:10.1101/2020.04.15.043166
- 560 13 Beigel JH, Tomashek KM, Dodd LE, *et al.* Remdesivir for the Treatment of Covid-19 -  
 561 Preliminary Report. *N Engl J Med* Published Online First: 22 May 2020. doi:10.1056/NEJMoa2007764
- 562 14 Groneberg DA, Poutanen SM, Low DE, *et al.* Treatment and vaccines for severe acute  
 563 respiratory syndrome. *Lancet Infect Dis* 2005;**5**:147–55. doi:10.1016/S1473-3099(05)01307-1
- 564 15 Liu X, Wang X-J. Potential inhibitors for 2019-nCoV coronavirus M protease from clinically  
 565 approved medicines. *bioRxiv* 2020;:2020.01.29.924100. doi:10.1101/2020.01.29.924100
- 566 16 Cao B, Wang Y, Wen D, *et al.* A Trial of Lopinavir-Ritonavir in Adults Hospitalized with Severe  
 567 Covid-19. *N Engl J Med* Published Online First: 18 March 2020. doi:10.1056/NEJMoa2001282
- 568 17 Stockman LJ, Bellamy R, Garner P. SARS: systematic review of treatment effects. *PLoS Med*  
 569 2006;**3**:e343. doi:10.1371/journal.pmed.0030343
- 570 18 Sheahan TP, Sims AC, Leist SR, *et al.* Comparative therapeutic efficacy of remdesivir and  
 571 combination lopinavir, ritonavir, and interferon beta against MERS-CoV. *Nat Commun* 2020;**11**:1–14.  
 572 doi:10.1038/s41467-019-13940-6
- 573 19 Chan JF-W, Yao Y, Yeung M-L, *et al.* Treatment With Lopinavir/Ritonavir or Interferon-beta1b  
 574 Improves Outcome of. *J Infect Dis* 2015;**212**:1904–13. doi:10.1093/infdis/jiv392
- 575 20 Arabi YM, Allothman A, Balkhy HH, *et al.* Treatment of Middle East Respiratory Syndrome with  
 576 a combination of lopinavir-ritonavir and interferon-β1b (MIRACLE trial): study protocol for a  
 577 randomized controlled trial. *Trials* 2018;**19**:81. doi:10.1186/s13063-017-2427-0

- 1  
2  
3 578 21 Lokugamage KG, Hage A, Schindewolf C, *et al.* SARS-CoV-2 is sensitive to type I interferon  
4 579 pretreatment. *bioRxiv* 2020;:2020.03.07.982264. doi:10.1101/2020.03.07.982264  
5 580 22 Sallard E, Lescure F-X, Yazdanpanah Y, *et al.* Type 1 interferons as a potential treatment  
6 581 against COVID-19. *Antiviral Res* 2020;178:104791. doi:10.1016/j.antiviral.2020.104791  
7 582 23 Hung IF-N, Lung K-C, Tso EY-K, *et al.* Triple combination of interferon beta-1b, lopinavir-  
8 583 ritonavir, and ribavirin in the treatment of patients admitted to hospital with COVID-19: an open-label,  
9 584 randomised, phase 2 trial. *Lancet* 2020;395:1695–704. doi:10.1016/S0140-6736(20)31042-4  
10 585 24 Miller DK, Lenard J. Antihistaminics, local anesthetics, and other amines as antiviral agents.  
11 586 *PNAS* 1981;78:3605–9. doi:10.1073/pnas.78.6.3605  
12 587 25 Keyaerts E, Vijgen L, Maes P, *et al.* In vitro inhibition of severe acute respiratory syndrome  
13 588 coronavirus by chloroquine. *Biochemical and Biophysical Research Communications* 2004;323:264–8.  
14 589 doi:10.1016/j.bbrc.2004.08.085  
15 590 26 Touret F, de Lamballerie X. Of chloroquine and COVID-19. *Antiviral Res* 2020;177:104762.  
16 591 doi:10.1016/j.antiviral.2020.104762  
17 592 27 Liu J, Cao R, Xu M, *et al.* Hydroxychloroquine, a less toxic derivative of chloroquine, is  
18 593 effective in inhibiting SARS-CoV-2 infection in vitro. *Cell Discov* 2020;6:1–4. doi:10.1038/s41421-020-  
19 594 0156-0  
20 595 28 Taccone FS, Gorham J, Vincent J-L. Hydroxychloroquine in the management of critically ill  
21 596 patients with COVID-19: the need for an evidence base. *The Lancet Respiratory Medicine* 2020;0.  
22 597 doi:10.1016/S2213-2600(20)30172-7  
23 598 29 Geleris J, Sun Y, Platt J, *et al.* Observational Study of Hydroxychloroquine in Hospitalized  
24 599 Patients with Covid-19. *New England Journal of Medicine* 2020;0:null. doi:10.1056/NEJMoa2012410  
25 600 30 Boulware DR, Pullen MF, Bangdiwala AS, *et al.* A Randomized Trial of Hydroxychloroquine as  
26 601 Postexposure Prophylaxis for Covid-19. *N Engl J Med* Published Online First: 3 June 2020.  
27 602 doi:10.1056/NEJMoa2016638  
28 603 31 Etievant S, Bal A, Escuret V, *et al.* Performance Assessment of SARS-CoV-2 PCR Assays  
29 604 Developed by WHO Referral Laboratories. *J Clin Med* 2020;9. doi:10.3390/jcm9061871  
30 605 32 Whitehead J. Sample size calculations for ordered categorical data. *Stat Med* 1993;12:2257–  
31 606 71. doi:10.1002/sim.4780122404  
32 607 33 Mulangu S, Dodd LE, Davey RT, *et al.* A Randomized, Controlled Trial of Ebola Virus Disease  
33 608 Therapeutics. *N Engl J Med* 2019;381:2293–303. doi:10.1056/NEJMoa1910993  
34 609 34 Haybittle JL. Repeated assessment of results in clinical trials of cancer treatment. *Br J Radiol*  
35 610 1971;44:793–7. doi:10.1259/0007-1285-44-526-793  
36 611 35 Peto R, Pike MC, Armitage P, *et al.* Design and analysis of randomized clinical trials requiring  
37 612 prolonged observation of each patient. I. Introduction and design. *Br J Cancer* 1976;34:585–612.  
38 613 doi:10.1038/bjc.1976.220  
39 614 36 Moustgaard H, Clayton GL, Jones HE, *et al.* Impact of blinding on estimated treatment effects  
40 615 in randomised clinical trials: meta-epidemiological study. *BMJ* 2020;368. doi:10.1136/bmj.l6802  
41 616 37 Nakkazi E. Randomised controlled trial begins for Ebola therapeutics. *Lancet* 2018;392:2338.  
42 617 doi:10.1016/S0140-6736(18)33011-3  
43 618 38 Sissoko D, Laouenan C, Folkesson E, *et al.* Experimental Treatment with Favipiravir for Ebola  
44 619 Virus Disease (the JIKI Trial): A Historically Controlled, Single-Arm Proof-of-Concept Trial in Guinea.  
45 620 *PLoS Med* 2016;13:e1001967. doi:10.1371/journal.pmed.1001967  
46 621 39 Fallah MP, Skrip LA. Ebola therapies: an unconventionally calculated risk. *Lancet*  
47 622 2019;393:850–2. doi:10.1016/S0140-6736(19)30160-6  
48 623 40 Fragkou PC, Belhadi D, Peiffer-Smadja N, *et al.* Review of trials currently testing treatment  
49 624 and prevention of COVID-19. *Clin Microbiol Infect* Published Online First: 23 May 2020.  
50 625 doi:10.1016/j.cmi.2020.05.019  
51 626 41 Peiffer-Smadja N, Lescure F-X, Sallard E, *et al.* Anticovid, a comprehensive open-access real-  
52 627 time platform of registered clinical studies for COVID-19. *J Antimicrob Chemother* Published Online  
53 628 First: 8 June 2020. doi:10.1093/jac/dkaa223  
54 629 42 Peiffer-Smadja N, Costagliola D. RE: Early Outpatient Treatment Of Symptomatic, High-Risk  
55 630 Covid-19 Patients That Should Be Ramped-Up Immediately As Key To The Pandemic Crisis. *Am J*  
56 631 *Epidemiol* Published Online First: 20 July 2020. doi:10.1093/aje/kwaa151  
57 632 43 Sattui SE, Liew JW, Graef ER, *et al.* Swinging the pendulum: lessons learned from public  
58 633 discourse concerning hydroxychloroquine and COVID-19. *Expert Rev Clin Immunol* Published Online  
59 634 First: 3 July 2020. doi:10.1080/1744666X.2020.1792778  
60 635 44 Laurent L. We've Lost Time in the Race for a Covid-19 Cure. *Washington Post*.  
61 636 2020.https://www.washingtonpost.com/business/weve-losttime-in-the-race-for-a-covid-19-  
62 637 cure/2020/04/29/78dff872-89df-11ea-80df-d24b35a568ae\_story.html (accessed 24 Jul 2020).

638

**List of members of the DisCoVeRy French Trial Management Team:**

639 FLORENCE ADER, NATHAN PEIFFER-SMADJA, DRIFA BELHADI, JULIEN POISSY, CLAIRE  
640 ANDREJAK, CHRISTELLE DELMAS, GILLES PEYTAVIN, JULIETTE SAILLARD, NOÉMIE MERCIER,  
641 AXELLE DUPONT, FRANÇOIS-XAVIER LESCURE, LILA BOUADMA, JEAN-FRANÇOIS TIMSIT,  
642 FLORENCE MORFIN-SHERPA, MAUDE BOUSCAMBERT, ALEXANDRE GAYMARD, LAURENT  
643 ABEL, CEDRIC LAOUÉAN, TONI ALFAIATE, BASMA BASLI, ANISSA CHAIR, SAMIRA LARIBI,  
644 JULIE LEVEL MARION SCHNEIDER, MARIE-CAPUCINE TELLIER, VINCA ICARD, BENJAMIN  
645 LEVEAU, SARAH TUBIANA, BENJAMIN HAMZE, AMBRE GELLEY, ERIC D'ORTENZIO, ORIANE  
646 PUECHAL, CAROLINE SEMAILLE, SANDRINE COUFFIN-CADIERGUES, CLAIRE FOUGEROU,  
647 LAËTITIA MOINOT, LINDA WITTKOP, CAROLE CAGNOT, SOIZIC LE MESTRE, DELPHINE  
648 LEBRASSEUR-LONGUET, VENTZISLAVA PETROV-SANCHEZ, MARION NORET, JÉRÉMIE  
649 GUEDJ, BRUNO LINA, ALPHA DIALLO, ALINE DECHANET, CHARLES BURDET, HÉLÈNE  
650 ESPEROU, DOMINIQUE COSTAGLIOLA, FRANCE MENTRE, YAZDAN YAZDANPANAH

652

**ACKNOWLEDGEMENTS**

653 We acknowledge the members of the DSMB: Stefano VELLA (chair), Guanhua DU, Donata  
654 MEDAGLINI, Mike JACOBS, Sylvie VAN DER WERF, Stuart POCOCK, Phaik Yeong CHEAH, Karen  
655 BARNES, Patrick YENI, and the independent statistician Tim COLLIER.

656 We acknowledge the principal investigators of each participating centre (by alphabetical order): CHU  
657 Amiens: Jean Philippe LANOIX, Yoann ZERBIB, CHU Avicenne, AP-HP: Olivier BOUCHAUD, Yves  
658 COHEN, CH Annecy-Genevois: Violaine TOLSMA, David BOUGON, CHU Besançon: Kevin  
659 BOUILLER, Jean-Christophe NAVELLOU, HIA Bégin: Cécile FICKO, Clément DUBOST, CHU Bichat-  
660 Claude Bernard, AP-HP : François-Xavier LESCURE, Jean-François TIMSIT, CHU Bordeaux: Denis  
661 MALVY, Didier GRUSON, CHU Cochin, AP-HP : Odile LAUNAY, Jean-Paul MIRA, Solen KERNEIS,  
662 Marie LACHATRE, CHU Dijon: Lionel PIROTH, Jean-Pierre QUENOT, Hopital Erasme: Maya HITES,  
663 CHU Fort-de-France: André CABIE, Cyrille CHABARTIER, CHU Grenoble: Olivier EPAULARD, Nicolas  
664 TERZI, CHU HEGP, AP-HP: David LEBEAUX, Jean-Luc DIEHL, Medizinische Universität Innsbruck :  
665 Michael JOANNIDIS, CHU Kremlin-Bicêtre, AP-HP: Stephane JAUREGUIBERRY, Samy  
666 FIGUEIREDO, CHR La Citadelle: Antoine ALTDORFER, CHRU Lille: Karine FAURE, Julien POISSY,

1  
2  
3 668 Kepler Universitätsklinikum Linz : Bernd LAMPRECHT, Centre Hospitalier de Luxembourg: Thérèse  
4  
5 669 STAUB, Jean REUTER, Hospices Civils de Lyon: Florence ADER, Jean-Christophe RICHARD, CHR  
6  
7 670 Metz: Céline ROBERT, Rostane GACI, CHU Montpellier: Vincent LE MOING, Kada KLOUCHE, CHU  
8  
9 671 Mondor, AP-HP: Sébastien GALLIEN, Armand MEKONTSO DESSAP, GHR Mulhouse: Joy MOOTIEN,  
10  
11 672 Olivier HINSCHBERGER, CHRU Nancy: François GOEHRINGER, Sébastien GIBOT, CHU Nantes:  
12  
13 673 François RAFFI, Jean REIGNIER, CHU Nice: Johan COURJEON, Jean DELLAMONICA, Sylvie  
14  
15 674 LEROY, Charles-Hugo MARQUETTE, CHU Pitié-Salpêtrière, AP-HP: Valérie POURCHER, Julien  
16  
17 675 MAYAUX, CHU Tenon, AP-HP: Gilles PIALOUX, Murielle FARTOUKH, CHU Saint-Antoine, AP-HP:  
18  
19 676 Karine LACOMBE, Hafid AIT TOUFELLA, CHU Saint-Louis, AP-HP: Jean-Michel MOLINA, Elie  
20  
21 677 AZOULAY, Clinique universitaire Saint-Luc: Leïla BELKHIR, CHU Reims: Firouze BANI-SADR, Bruno  
22  
23 678 MOURVILLIER, CHU Rennes: François BENEZIT, Yves LE TULZO, CH Saint-Denis: Jérôme ABOAB,  
24  
25 679 Flora CROCKETT, Hopital Robert Schuman: Marc BERNA, GH Paris Saint-Joseph-Marie Lannelongue:  
26  
27 680 Cédric BRUEL, Benoit PILMIS, François STEFAN, Jérôme LE PAVEC, CHU Saint-Étienne: Elisabeth  
28  
29 681 BOTELHO-NEVERS, Guillaume THIERY, Landeskrankenhaus Salzburg: Richard GREIL, CHRU  
30  
31 682 Strasbourg: François DANION, Ferhat MEZIANI, CHU Toulouse: Guillaume MARTIN BLONDEL,  
32  
33 683 Béatrice RIU-POULENC, Fanny BOUNES-VARDON, CH Tourcoing: Eric SENNEVILLE, Vanessa  
34  
35 684 JEAN-MICHEL, CHU Tours: Louis BERNARD, Denis GAROT.  
36  
37 685 We acknowledge the following individuals: Drug supply: Johanna GUILLON, Anne-Marie TABURET  
38  
39 686 Project manager, Monitoring Project Managers: Chloé BIRKLE (ANRS), Cécile MOINS (ANRS), Lydie  
40  
41 687 BENIGUEL (CMG U1136, Inserm), Michèle GENIN (CMG U1136, Inserm), Asma ESSAT (SC10 1018,  
42  
43 688 Inserm), Mathilde GHISLAIN (SC10 1018, Inserm), Maud BROSSARD (SC10 1018, Inserm), Yoann  
44  
45 689 RIAULT (Inserm), Emmanuelle NETZER (Inserm), Alain CARO (DRI Rennes), Charlotte CAMELI (DRI  
46  
47 690 Rennes), Marie-José NGO UM TEGUE (DRI Rennes), Virginie GODARD (URC Bichat)  
48  
49 691 Pharmacovigilance: Séverine GIBOWSKI, Christelle PAUL, Elise LANDRY, Joséphine BALSSA, Léna  
50  
51 692 WADOUACHI, Anais LE GOFF, Laurence MOACHON, Inserm-Transfert: Pascale AUGÉ, Mireille  
52  
53 693 CARALP, Nathalie DUGAS, Clinical Research Unit CHU Bichat-Claude Bernard: Camille  
54  
55 694 COUFFIGNAL.  
56  
57 695 We thank all staff involved in data monitoring. We thank the COVID-19 Partners Platform.  
58  
59 696 This study was conducted with the support of GILEAD, SANOFI, MERCK and ABBVIE that provided  
60  
697 the study drugs.

1  
2  
3 698 We acknowledge the support of Université Claude Bernard Lyon 1, Hospices Civils de Lyon, Université  
4  
5 699 de Paris, and the French Society for Infectious Diseases (SPILF).

6  
7 700

8  
9 701 **FUNDING**

10 702 The trial is funded by a grant from Programme Hospitalier de Recherche Clinique - PHRC 2020 (PHRC-  
11  
12 703 20-0351) (Ministry of Health).

13  
14 704 This study also received a financial support from REACTing, a French multi-disciplinary collaborative  
15  
16 705 network working on emerging infectious diseases. The trial is sponsored by Institut national de la santé  
17  
18 706 et de la recherche médicale (INSERM, France).

19  
20 707

21  
22 708 **COMPETING INTERESTS**

23  
24 709

25  
26 710 François-Xavier Lescure reports fees for development of educational presentations from Gilead, outside  
27  
28 711 the submitted work. Dominique Costagliola reports personal fees from Merck Switzerland, grants and  
29  
30 712 personal fees from MSD France, personal fees from Gilead France, grants and personal fees from  
31  
32 713 Janssen, outside the submitted work. Jean-François Timsit reports grants and personal fees from  
33  
34 714 Merck, grants and personal fees from Pfizer, grants from biomerieux, personal fees from medimune,  
35  
36 715 personal fees from Paratek, personal fees from Gilead, outside the submitted work. Benjamin Hamze  
37  
38 716 reports personal fees from Sanofi, outside the submitted work. Gilles Peytavin has received travel  
39  
40 717 grants, consultancy fees, honoraria, or study grants from various pharmaceutical companies, including  
41  
42 718 Gilead Sciences, Merck, TheraTechnologies and ViiV Healthcare. France Mentre reports grants and  
43  
44 719 personal fees from Sanofi, outside the submitted work.

45 720 Other authors declare no competing interests.

46  
47 721

48  
49 722 **DISCLAIMER**

50  
51 723 The funder nor the sponsor did not have any role in the design of the trial  
52  
53  
54  
55  
56  
57  
58  
59  
60





Figure 1. DisCoVeRy trial arms, drugs and dosing schedule

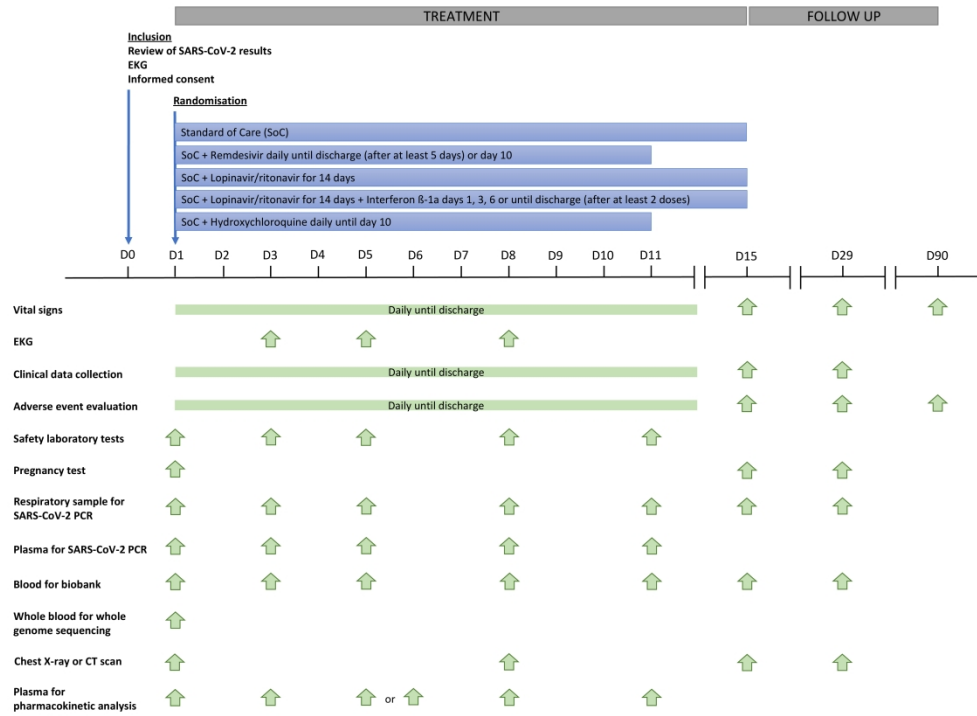

Figure 2. Schematic representation of the experimental design of the DisCoVeRy clinical trial.

419x299mm (300 x 300 DPI)

1  
2  
3  
4  
5 **The French DisCoVeRy Trial Management Team**  
6  
7

8 **Principal Investigator:** Florence ADER  
9

10 **Scientific coordinator:** Yazdan YAZDANPANA  
11  
12

13 **Chief methodologist:** France MENTRE  
14

15 **Infectious diseases specialists:** Nathan PEIFFER-SMADJA, François-Xavier LESCURE  
16

17 **Intensivists:** Julien POISSY, Lila BOUADMA, Jean-François TIMSIT  
18

19 **Virologists:** Bruno LINA, Florence MORFIN-SHERPA, Maude BOUSCAMPERT, Alexandre  
20  
21 GAYMARD  
22

23 **Pharmacologist:** Gilles PEYTAVIN  
24

25 **Genetic:** Laurent ABEL  
26

27 **Viral modeling:** Jeremie GUEDJ  
28

29 **Pneumologist:** Claire ANDREJAK  
30

31 **Clinical Trial Unit:**  
32

33 **Methodologists:** Charles BURDET, Cedric LAOUENAN  
34

35 **Statisticians:** Drifa BELHADI, Axelle DUPONT  
36

37 **E-CRF designers and data managers:** Toni ALFAIATE, Basma BASLI, Anissa CHAIR, Samira  
38  
39 LARIBI, Julie LEVEL Marion SCHNEIDER, Marie-Capucine TELLIER  
40  
41

42 **Project manager:** Aline DECHANET  
43

44 **DisCoVeRy Trial steering committee:** Dominique COSTAGLIOLA  
45

46 **Inserm sponsor:** Sandrine COUFFIN-CADIERGUES, H el ene ESPEROU  
47

48 **Inserm project manager:** Christelle DELMAS, Juliette SAILLARD  
49

50 **Monitoring:** Claire FOUGEROU, La etitia MOINOT, Linda WITTKOP  
51

52 **ANRS coordination:** Carole CAGNOT, Soizic LE MESTRE, Delphine LEBRASSEUR-LONGUET,  
53  
54 Ventzislava PETROV-SANCHEZ  
55

56 **Inserm-ANRS Pharmacovigilance:** Alpha DIALLO, No emie MERCIER,  
57

58 **Samples handling:** Vinca ICARD, Benjamin LEVEAU, Sarah TUBIANA  
59  
60



1  
2  
3 **Drug supply:** Benjamin HAMZE, Ambre GELLEY  
4

5 **RENARCI:** Marion NORET  
6

7 **REACTing:** Eric D'ORTENZIO, Oriane PUECHAL, Caroline SEMAILLE  
8  
9  
10  
11  
12  
13  
14  
15  
16  
17  
18  
19  
20  
21  
22  
23  
24  
25  
26  
27  
28  
29  
30  
31  
32  
33  
34  
35  
36  
37  
38  
39  
40  
41  
42  
43  
44  
45  
46  
47  
48  
49  
50  
51  
52  
53  
54  
55  
56  
57  
58  
59  
60

For peer review only

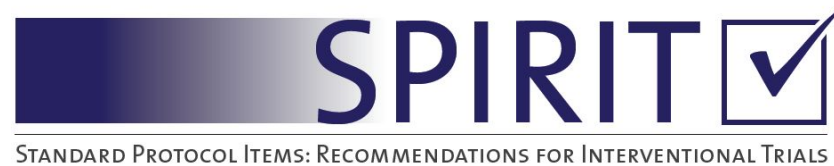

SPIRIT 2013 Checklist: Recommended items to address in a clinical trial protocol and related documents\*

| Section/item                      | Item No | Description                                                                                                                                                                                                                                                                              | Addressed on page number  |
|-----------------------------------|---------|------------------------------------------------------------------------------------------------------------------------------------------------------------------------------------------------------------------------------------------------------------------------------------------|---------------------------|
| <b>Administrative information</b> |         |                                                                                                                                                                                                                                                                                          |                           |
| Title                             | 1       | Descriptive title identifying the study design, population, interventions, and, if applicable, trial acronym                                                                                                                                                                             | 1 _____                   |
| Trial registration                | 2a      | Trial identifier and registry name. If not yet registered, name of intended registry                                                                                                                                                                                                     | 2 _____                   |
|                                   | 2b      | All items from the World Health Organization Trial Registration Data Set                                                                                                                                                                                                                 | 2, 5 _____                |
| Protocol version                  | 3       | Date and version identifier                                                                                                                                                                                                                                                              | 15 _____                  |
| Funding                           | 4       | Sources and types of financial, material, and other support                                                                                                                                                                                                                              | 25 _____                  |
| Roles and responsibilities        | 5a      | Names, affiliations, and roles of protocol contributors                                                                                                                                                                                                                                  | 23-24 and Supplementary 1 |
|                                   | 5b      | Name and contact information for the trial sponsor                                                                                                                                                                                                                                       | 5, 26 _____               |
|                                   | 5c      | Role of study sponsor and funders, if any, in study design; collection, management, analysis, and interpretation of data; writing of the report; and the decision to submit the report for publication, including whether they will have ultimate authority over any of these activities | 26 _____                  |
|                                   | 5d      | Composition, roles, and responsibilities of the coordinating centre, steering committee, endpoint adjudication committee, data management team, and other individuals or groups overseeing the trial, if applicable (see Item 21a for data monitoring committee)                         | 14-15 _____               |

|    |                                                           |     |                                                                                                               |                     |
|----|-----------------------------------------------------------|-----|---------------------------------------------------------------------------------------------------------------|---------------------|
| 1  | <b>Introduction</b>                                       |     |                                                                                                               |                     |
| 2  |                                                           |     |                                                                                                               |                     |
| 3  | Background and                                            | 6a  | Description of research question and justification for undertaking the trial, including summary of relevant   | 4, 7-8_____         |
| 4  | rationale                                                 |     | studies (published and unpublished) examining benefits and harms for each intervention                        |                     |
| 5  |                                                           |     |                                                                                                               |                     |
| 6  |                                                           | 6b  | Explanation for choice of comparators                                                                         | 7-8, 16_____        |
| 7  |                                                           |     |                                                                                                               |                     |
| 8  | Objectives                                                | 7   | Specific objectives or hypotheses                                                                             | 5_____              |
| 9  |                                                           |     |                                                                                                               |                     |
| 10 | Trial design                                              | 8   | Description of trial design including type of trial (eg, parallel group, crossover, factorial, single group), | 5_____              |
| 11 |                                                           |     | allocation ratio, and framework (eg, superiority, equivalence, noninferiority, exploratory)                   |                     |
| 12 |                                                           |     |                                                                                                               |                     |
| 13 |                                                           |     |                                                                                                               |                     |
| 14 | <b>Methods: Participants, interventions, and outcomes</b> |     |                                                                                                               |                     |
| 15 |                                                           |     |                                                                                                               |                     |
| 16 | Study setting                                             | 9   | Description of study settings (eg, community clinic, academic hospital) and list of countries where data will | 5-6_____            |
| 17 |                                                           |     | be collected. Reference to where list of study sites can be obtained                                          |                     |
| 18 |                                                           |     |                                                                                                               |                     |
| 19 | Eligibility criteria                                      | 10  | Inclusion and exclusion criteria for participants. If applicable, eligibility criteria for study centres and  | 5-6_____            |
| 20 |                                                           |     | individuals who will perform the interventions (eg, surgeons, psychotherapists)                               |                     |
| 21 |                                                           |     |                                                                                                               |                     |
| 22 | Interventions                                             | 11a | Interventions for each group with sufficient detail to allow replication, including how and when they will be | 7, 20_____          |
| 23 |                                                           |     | administered                                                                                                  |                     |
| 24 |                                                           |     |                                                                                                               |                     |
| 25 |                                                           | 11b | Criteria for discontinuing or modifying allocated interventions for a given trial participant (eg, drug dose  | 13_____             |
| 26 |                                                           |     | change in response to harms, participant request, or improving/worsening disease)                             |                     |
| 27 |                                                           |     |                                                                                                               |                     |
| 28 |                                                           | 11c | Strategies to improve adherence to intervention protocols, and any procedures for monitoring adherence        | 20_____             |
| 29 |                                                           |     | (eg, drug tablet return, laboratory tests)                                                                    |                     |
| 30 |                                                           |     |                                                                                                               |                     |
| 31 |                                                           | 11d | Relevant concomitant care and interventions that are permitted or prohibited during the trial                 | 5_____              |
| 32 |                                                           |     |                                                                                                               |                     |
| 33 | Outcomes                                                  | 12  | Primary, secondary, and other outcomes, including the specific measurement variable (eg, systolic blood       | 9-11_____           |
| 34 |                                                           |     | pressure), analysis metric (eg, change from baseline, final value, time to event), method of aggregation (eg, |                     |
| 35 |                                                           |     | median, proportion), and time point for each outcome. Explanation of the clinical relevance of chosen         |                     |
| 36 |                                                           |     | efficacy and harm outcomes is strongly recommended                                                            |                     |
| 37 |                                                           |     |                                                                                                               |                     |
| 38 | Participant timeline                                      | 13  | Time schedule of enrolment, interventions (including any run-ins and washouts), assessments, and visits for   | 8-19, 19-20, Figure |
| 39 |                                                           |     | participants. A schematic diagram is highly recommended (see Figure)                                          | 2_____              |
| 40 |                                                           |     |                                                                                                               |                     |
| 41 |                                                           |     |                                                                                                               |                     |
| 42 |                                                           |     |                                                                                                               |                     |
| 43 |                                                           |     |                                                                                                               |                     |
| 44 |                                                           |     |                                                                                                               |                     |
| 45 |                                                           |     |                                                                                                               |                     |
| 46 |                                                           |     |                                                                                                               |                     |

|   |             |    |                                                                                                                                                                                       |            |
|---|-------------|----|---------------------------------------------------------------------------------------------------------------------------------------------------------------------------------------|------------|
| 1 | Sample size | 14 | Estimated number of participants needed to achieve study objectives and how it was determined, including clinical and statistical assumptions supporting any sample size calculations | 12-13_____ |
| 2 |             |    |                                                                                                                                                                                       |            |
| 3 |             |    |                                                                                                                                                                                       |            |
| 4 | Recruitment | 15 | Strategies for achieving adequate participant enrolment to reach target sample size                                                                                                   | 15_____    |
| 5 |             |    |                                                                                                                                                                                       |            |

### 6 **Methods: Assignment of interventions (for controlled trials)**

#### 7 Allocation:

|    |                    |     |                                                                                                                                                                                                                                                                                                                                                          |          |
|----|--------------------|-----|----------------------------------------------------------------------------------------------------------------------------------------------------------------------------------------------------------------------------------------------------------------------------------------------------------------------------------------------------------|----------|
| 8  |                    |     |                                                                                                                                                                                                                                                                                                                                                          |          |
| 9  |                    |     |                                                                                                                                                                                                                                                                                                                                                          |          |
| 10 | Sequence           | 16a | Method of generating the allocation sequence (eg, computer-generated random numbers), and list of any factors for stratification. To reduce predictability of a random sequence, details of any planned restriction (eg, blocking) should be provided in a separate document that is unavailable to those who enrol participants or assign interventions | 6-7_____ |
| 11 | generation         |     |                                                                                                                                                                                                                                                                                                                                                          |          |
| 12 |                    |     |                                                                                                                                                                                                                                                                                                                                                          |          |
| 13 |                    |     |                                                                                                                                                                                                                                                                                                                                                          |          |
| 14 |                    |     |                                                                                                                                                                                                                                                                                                                                                          |          |
| 15 |                    |     |                                                                                                                                                                                                                                                                                                                                                          |          |
| 16 | Allocation         | 16b | Mechanism of implementing the allocation sequence (eg, central telephone; sequentially numbered, opaque, sealed envelopes), describing any steps to conceal the sequence until interventions are assigned                                                                                                                                                | 7_____   |
| 17 | concealment        |     |                                                                                                                                                                                                                                                                                                                                                          |          |
| 18 | mechanism          |     |                                                                                                                                                                                                                                                                                                                                                          |          |
| 19 |                    |     |                                                                                                                                                                                                                                                                                                                                                          |          |
| 20 | Implementation     | 16c | Who will generate the allocation sequence, who will enrol participants, and who will assign participants to interventions                                                                                                                                                                                                                                | 6-7_____ |
| 21 |                    |     |                                                                                                                                                                                                                                                                                                                                                          |          |
| 22 |                    |     |                                                                                                                                                                                                                                                                                                                                                          |          |
| 23 |                    |     |                                                                                                                                                                                                                                                                                                                                                          |          |
| 24 | Blinding (masking) | 17a | Who will be blinded after assignment to interventions (eg, trial participants, care providers, outcome assessors, data analysts), and how                                                                                                                                                                                                                | 5, 17    |
| 25 |                    |     |                                                                                                                                                                                                                                                                                                                                                          |          |
| 26 |                    |     |                                                                                                                                                                                                                                                                                                                                                          |          |
| 27 |                    | 17b | If blinded, circumstances under which unblinding is permissible, and procedure for revealing a participant's allocated intervention during the trial                                                                                                                                                                                                     | n/a_____ |
| 28 |                    |     |                                                                                                                                                                                                                                                                                                                                                          |          |
| 29 |                    |     |                                                                                                                                                                                                                                                                                                                                                          |          |
| 30 |                    |     |                                                                                                                                                                                                                                                                                                                                                          |          |

### 31 **Methods: Data collection, management, and analysis**

|    |                 |     |                                                                                                                                                                                                                                                                                                                                                                                                              |                  |
|----|-----------------|-----|--------------------------------------------------------------------------------------------------------------------------------------------------------------------------------------------------------------------------------------------------------------------------------------------------------------------------------------------------------------------------------------------------------------|------------------|
| 32 |                 |     |                                                                                                                                                                                                                                                                                                                                                                                                              |                  |
| 33 | Data collection | 18a | Plans for assessment and collection of outcome, baseline, and other trial data, including any related processes to promote data quality (eg, duplicate measurements, training of assessors) and a description of study instruments (eg, questionnaires, laboratory tests) along with their reliability and validity, if known. Reference to where data collection forms can be found, if not in the protocol | 11-12, Table 1__ |
| 34 | methods         |     |                                                                                                                                                                                                                                                                                                                                                                                                              |                  |
| 35 |                 |     |                                                                                                                                                                                                                                                                                                                                                                                                              |                  |
| 36 |                 |     |                                                                                                                                                                                                                                                                                                                                                                                                              |                  |
| 37 |                 |     |                                                                                                                                                                                                                                                                                                                                                                                                              |                  |
| 38 |                 | 18b | Plans to promote participant retention and complete follow-up, including list of any outcome data to be collected for participants who discontinue or deviate from intervention protocols                                                                                                                                                                                                                    | 13_____          |
| 39 |                 |     |                                                                                                                                                                                                                                                                                                                                                                                                              |                  |
| 40 |                 |     |                                                                                                                                                                                                                                                                                                                                                                                                              |                  |
| 41 |                 |     |                                                                                                                                                                                                                                                                                                                                                                                                              |                  |
| 42 |                 |     |                                                                                                                                                                                                                                                                                                                                                                                                              |                  |

|    |                                 |     |                                                                                                                                                                                                                                                                                                                                       |            |
|----|---------------------------------|-----|---------------------------------------------------------------------------------------------------------------------------------------------------------------------------------------------------------------------------------------------------------------------------------------------------------------------------------------|------------|
| 1  | Data management                 | 19  | Plans for data entry, coding, security, and storage, including any related processes to promote data quality (eg, double data entry; range checks for data values). Reference to where details of data management procedures can be found, if not in the protocol                                                                     | 11-12_____ |
| 2  |                                 |     |                                                                                                                                                                                                                                                                                                                                       |            |
| 3  |                                 |     |                                                                                                                                                                                                                                                                                                                                       |            |
| 4  |                                 |     |                                                                                                                                                                                                                                                                                                                                       |            |
| 5  | Statistical methods             | 20a | Statistical methods for analysing primary and secondary outcomes. Reference to where other details of the statistical analysis plan can be found, if not in the protocol                                                                                                                                                              | 12-14      |
| 6  |                                 |     |                                                                                                                                                                                                                                                                                                                                       |            |
| 7  |                                 |     |                                                                                                                                                                                                                                                                                                                                       |            |
| 8  |                                 | 20b | Methods for any additional analyses (eg, subgroup and adjusted analyses)                                                                                                                                                                                                                                                              | 14_____    |
| 9  |                                 |     |                                                                                                                                                                                                                                                                                                                                       |            |
| 10 |                                 | 20c | Definition of analysis population relating to protocol non-adherence (eg, as randomised analysis), and any statistical methods to handle missing data (eg, multiple imputation)                                                                                                                                                       | 14_____    |
| 11 |                                 |     |                                                                                                                                                                                                                                                                                                                                       |            |
| 12 |                                 |     |                                                                                                                                                                                                                                                                                                                                       |            |
| 13 |                                 |     |                                                                                                                                                                                                                                                                                                                                       |            |
| 14 | <b>Methods: Monitoring</b>      |     |                                                                                                                                                                                                                                                                                                                                       |            |
| 15 |                                 |     |                                                                                                                                                                                                                                                                                                                                       |            |
| 16 | Data monitoring                 | 21a | Composition of data monitoring committee (DMC); summary of its role and reporting structure; statement of whether it is independent from the sponsor and competing interests; and reference to where further details about its charter can be found, if not in the protocol. Alternatively, an explanation of why a DMC is not needed | 11, 13, 15 |
| 17 |                                 |     |                                                                                                                                                                                                                                                                                                                                       |            |
| 18 |                                 |     |                                                                                                                                                                                                                                                                                                                                       |            |
| 19 |                                 |     |                                                                                                                                                                                                                                                                                                                                       |            |
| 20 |                                 |     |                                                                                                                                                                                                                                                                                                                                       |            |
| 21 |                                 |     |                                                                                                                                                                                                                                                                                                                                       |            |
| 22 |                                 | 21b | Description of any interim analyses and stopping guidelines, including who will have access to these interim results and make the final decision to terminate the trial                                                                                                                                                               | 13         |
| 23 |                                 |     |                                                                                                                                                                                                                                                                                                                                       |            |
| 24 |                                 |     |                                                                                                                                                                                                                                                                                                                                       |            |
| 25 | Harms                           | 22  | Plans for collecting, assessing, reporting, and managing solicited and spontaneously reported adverse events and other unintended effects of trial interventions or trial conduct                                                                                                                                                     | 12_____    |
| 26 |                                 |     |                                                                                                                                                                                                                                                                                                                                       |            |
| 27 |                                 |     |                                                                                                                                                                                                                                                                                                                                       |            |
| 28 | Auditing                        | 23  | Frequency and procedures for auditing trial conduct, if any, and whether the process will be independent from investigators and the sponsor                                                                                                                                                                                           | _16_____   |
| 29 |                                 |     |                                                                                                                                                                                                                                                                                                                                       |            |
| 30 |                                 |     |                                                                                                                                                                                                                                                                                                                                       |            |
| 31 |                                 |     |                                                                                                                                                                                                                                                                                                                                       |            |
| 32 | <b>Ethics and dissemination</b> |     |                                                                                                                                                                                                                                                                                                                                       |            |
| 33 |                                 |     |                                                                                                                                                                                                                                                                                                                                       |            |
| 34 | Research ethics approval        | 24  | Plans for seeking research ethics committee/institutional review board (REC/IRB) approval                                                                                                                                                                                                                                             | 15-16      |
| 35 |                                 |     |                                                                                                                                                                                                                                                                                                                                       |            |
| 36 |                                 |     |                                                                                                                                                                                                                                                                                                                                       |            |
| 37 | Protocol amendments             | 25  | Plans for communicating important protocol modifications (eg, changes to eligibility criteria, outcomes, analyses) to relevant parties (eg, investigators, REC/IRBs, trial participants, trial registries, journals, regulators)                                                                                                      | 15-16_____ |
| 38 |                                 |     |                                                                                                                                                                                                                                                                                                                                       |            |
| 39 |                                 |     |                                                                                                                                                                                                                                                                                                                                       |            |
| 40 |                                 |     |                                                                                                                                                                                                                                                                                                                                       |            |
| 41 |                                 |     |                                                                                                                                                                                                                                                                                                                                       |            |
| 42 |                                 |     |                                                                                                                                                                                                                                                                                                                                       |            |

|    |                               |     |                                                                                                                                                                                                                                                                                     |            |
|----|-------------------------------|-----|-------------------------------------------------------------------------------------------------------------------------------------------------------------------------------------------------------------------------------------------------------------------------------------|------------|
| 1  | Consent or assent             | 26a | Who will obtain informed consent or assent from potential trial participants or authorised surrogates, and how (see Item 32)                                                                                                                                                        | 16_____    |
| 2  |                               |     |                                                                                                                                                                                                                                                                                     |            |
| 3  |                               |     |                                                                                                                                                                                                                                                                                     |            |
| 4  |                               | 26b | Additional consent provisions for collection and use of participant data and biological specimens in ancillary studies, if applicable                                                                                                                                               | 16_____    |
| 5  |                               |     |                                                                                                                                                                                                                                                                                     |            |
| 6  |                               |     |                                                                                                                                                                                                                                                                                     |            |
| 7  | Confidentiality               | 27  | How personal information about potential and enrolled participants will be collected, shared, and maintained in order to protect confidentiality before, during, and after the trial                                                                                                | 12_____    |
| 8  |                               |     |                                                                                                                                                                                                                                                                                     |            |
| 9  |                               |     |                                                                                                                                                                                                                                                                                     |            |
| 10 | Declaration of interests      | 28  | Financial and other competing interests for principal investigators for the overall trial and each study site                                                                                                                                                                       | 26_____    |
| 11 |                               |     |                                                                                                                                                                                                                                                                                     |            |
| 12 |                               |     |                                                                                                                                                                                                                                                                                     |            |
| 13 | Access to data                | 29  | Statement of who will have access to the final trial dataset, and disclosure of contractual agreements that limit such access for investigators                                                                                                                                     | 15-16      |
| 14 |                               |     |                                                                                                                                                                                                                                                                                     |            |
| 15 |                               |     |                                                                                                                                                                                                                                                                                     |            |
| 16 | Ancillary and post-trial care | 30  | Provisions, if any, for ancillary and post-trial care, and for compensation to those who suffer harm from trial participation                                                                                                                                                       | 5_____     |
| 17 |                               |     |                                                                                                                                                                                                                                                                                     |            |
| 18 |                               |     |                                                                                                                                                                                                                                                                                     |            |
| 19 |                               |     |                                                                                                                                                                                                                                                                                     |            |
| 20 | Dissemination policy          | 31a | Plans for investigators and sponsor to communicate trial results to participants, healthcare professionals, the public, and other relevant groups (eg, via publication, reporting in results databases, or other data sharing arrangements), including any publication restrictions | 16_____    |
| 21 |                               |     |                                                                                                                                                                                                                                                                                     |            |
| 22 |                               |     |                                                                                                                                                                                                                                                                                     |            |
| 23 |                               |     |                                                                                                                                                                                                                                                                                     |            |
| 24 |                               | 31b | Authorship eligibility guidelines and any intended use of professional writers                                                                                                                                                                                                      | 23-24_____ |
| 25 |                               |     |                                                                                                                                                                                                                                                                                     |            |
| 26 |                               | 31c | Plans, if any, for granting public access to the full protocol, participant-level dataset, and statistical code                                                                                                                                                                     | 18_____    |
| 27 |                               |     |                                                                                                                                                                                                                                                                                     |            |
| 28 |                               |     |                                                                                                                                                                                                                                                                                     |            |
| 29 | <b>Appendices</b>             |     |                                                                                                                                                                                                                                                                                     |            |
| 30 |                               |     |                                                                                                                                                                                                                                                                                     |            |
| 31 | Informed consent materials    | 32  | Model consent form and other related documentation given to participants and authorised surrogates                                                                                                                                                                                  | n/a_____   |
| 32 |                               |     |                                                                                                                                                                                                                                                                                     |            |
| 33 |                               |     |                                                                                                                                                                                                                                                                                     |            |
| 34 | Biological specimens          | 33  | Plans for collection, laboratory evaluation, and storage of biological specimens for genetic or molecular analysis in the current trial and for future use in ancillary studies, if applicable                                                                                      | Table 1    |
| 35 |                               |     |                                                                                                                                                                                                                                                                                     |            |
| 36 |                               |     |                                                                                                                                                                                                                                                                                     |            |

\*It is strongly recommended that this checklist be read in conjunction with the SPIRIT 2013 Explanation & Elaboration for important clarification on the items. Amendments to the protocol should be tracked and dated. The SPIRIT checklist is copyrighted by the SPIRIT Group under the Creative Commons "[Attribution-NonCommercial-NoDerivs 3.0 Unported](https://creativecommons.org/licenses/by-nc-nd/3.0/)" license.
