# Supplementary material for: Protocol for the DisCoVeRy trial: multicentre, adaptive, randomised trial of the safety and efficacy of treatments for COVID-19 in hospitalised adults
Source: PubMed Central journal article supplement — BMJ Open. 2020 Sep 21;10(9):e041437. doi: 10.1136/bmjopen-2020-041437 (PMC7507250; doi:10.1136/bmjopen-2020-041437), 2020-09-21
Supplement: bmjopen-2020-041437supp001.pdf [file bmjopen-2020-041437supp001.pdf]

**The French DisCoVeRy Trial Management Team**

**Principal Investigator:** Florence ADER

**Scientific coordinator:** Yazdan YAZDANPANAHA

**Chief methodologist:** France MENTRE

**Infectious diseases specialists:** Nathan PEIFFER-SMADJA, François-Xavier LESCURE

**Intensivists:** Julien POISSY, Lila BOUADMA, Jean-François TIMSIT

**Virologists:** Bruno LINA, Florence MORFIN-SHERPA, Maude BOUSCAMPBERT, Alexandre GAYMARD

**Pharmacologist:** Gilles PEYTAVIN

**Genetic:** Laurent ABEL

**Viral modeling:** Jeremie GUEDJ

**Pneumologist:** Claire ANDREJAK

**Clinical Trial Unit:**

**Methodologists:** Charles BURDET, Cedric LAOUENAN

**Statisticians:** Drifa BELHADI, Axelle DUPONT

**E-CRF designers and data managers:** Toni ALFAIATE, Basma BASLI, Anissa CHAIR, Samira LARIBI, Julie LEVEL Marion SCHNEIDER, Marie-Capucine TELLIER

**Project manager:** Aline DECHANET

**DisCoVeRy Trial steering committee:** Dominique COSTAGLIOLA

**Inserm sponsor:** Sandrine COUFFIN-CADIERGUES, H el ene ESPEROU

**Inserm project manager:** Christelle DELMAS, Juliette SAILLARD

**Monitoring:** Claire FOUGEROU, La etitia MOINOT, Linda WITTKOP

**ANRS coordination:** Carole CAGNOT, Soizic LE MESTRE, Delphine LEBRASSEUR-LONGUET, Ventzislava PETROV-SANCHEZ

**Inserm-ANRS Pharmacovigilance:** Alpha DIALLO, No emie MERCIER,

**Samples handling:** Vinca ICARD, Benjamin LEVEAU, Sarah TUBIANA

**Drug supply:** Benjamin HAMZE, Ambre GELLEY

**RENARCI:** Marion NORET

**REACTing:** Eric D'ORTENZIO, Oriane PUECHAL, Caroline SEMAILLE
